# Supplementary material for: Potent Platinum(IV) Prodrugs That Incorporate a Biotin Moiety to Selectively Target Cancer Cells
Source: MDPI journal article supplement (doi:10.3390/pharmaceutics14122780), 2022-12-12
Supplement: s1 [file s1]

# Supplementary Materials: Potent Platinum(IV) Prodrugs that Incorporate a Biotin Moiety to Selectively Target Cancer Cells

Aleen Khoury, Jennette A. Sakoff, Jayne Gilbert, Shawan Karan, Christopher P. Gordon and Janice R. Aldrich-Wright

## 1. Flash Chromatography

**Table S1.** The flash chromatography conditions for 1–4, including flow rates, gradients and elution of complexes represented by column volume (CV).

| Complex                                                                                             | Flowrate (mL/min) | Gradient (% MeOH (B)) over various CVs | Elution of complex (CV) |
|-----------------------------------------------------------------------------------------------------|-------------------|----------------------------------------|-------------------------|
| [Pt(Phen)(SSDACH)(Biotin)(OH)](NO <sub>3</sub> ) <sub>2</sub> (1)                                   | 4                 | 0% B for 4 CV<br>0–20% B for 4 CV      | 5–7                     |
| [Pt(56Me <sub>2</sub> Phen)(SSDACH)(Biotin)](OH) (NO <sub>3</sub> ) <sub>2</sub> (2)                | 4                 | 0% B for 4 CV<br>0–30% B for 6 CV      | 7–9                     |
| [Pt(47O <sub>2</sub> Me <sub>2</sub> Phen)(SSDACH)(Biotin) (OH)](NO <sub>3</sub> ) <sub>2</sub> (3) | 4                 | 0% B for 5 CV<br>0–30% B for 7 CV      | 9–11                    |
| [Pt(5MePhen)(SSDACH)(Biotin)(OH)] (NO <sub>3</sub> ) <sub>2</sub> (4)                               | 4                 | 0% B for 4 CV<br>0–25% B for 5 CV      | 6–8                     |

## 2. Cellular Accumulation

**Table S2.** The number of cells per well for each cell line and replicate.

| Replicate | Cell line | Number of cells per well |
|-----------|-----------|--------------------------|
| 1         | MCF-7     | 2.20 × 10 <sup>5</sup>   |
|           | MCF10A    | 3.15 × 10 <sup>5</sup>   |
| 2         | MCF-7     | 2.30 × 10 <sup>5</sup>   |
|           | MCF10A    | 1.10 × 10 <sup>5</sup>   |
| 3         | MCF-7     | 3.20 × 10 <sup>5</sup>   |
|           | MCF10A    | 2.95 × 10 <sup>5</sup>   |

## 3. NMR Spectra

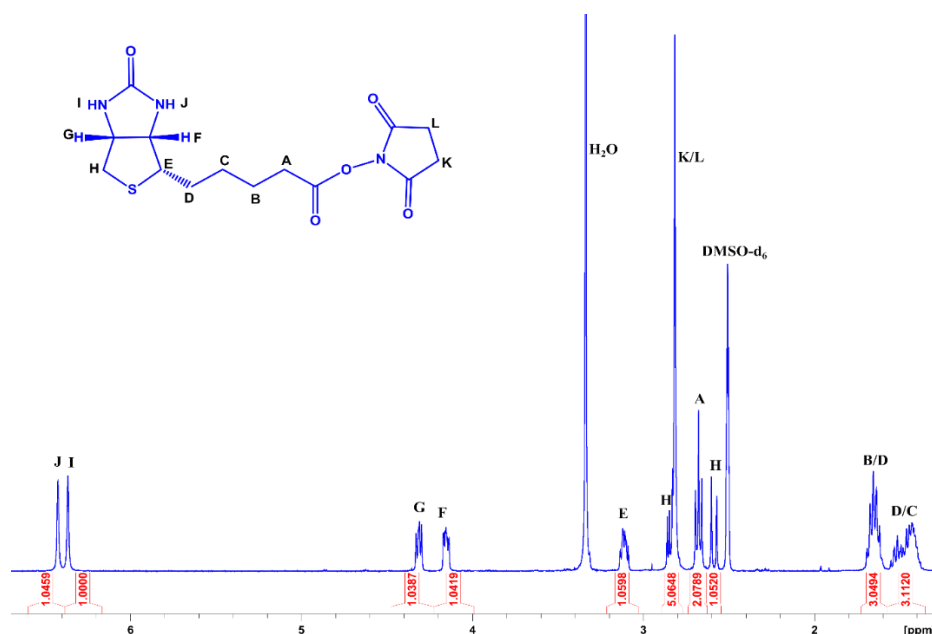

**Figure S1.** The <sup>1</sup>H NMR spectrum of biotin-NHS ester in DMSO-d<sub>6</sub> at 298 K. Insert: The chemical structure of biotin-NHS ester with assigned numbering.

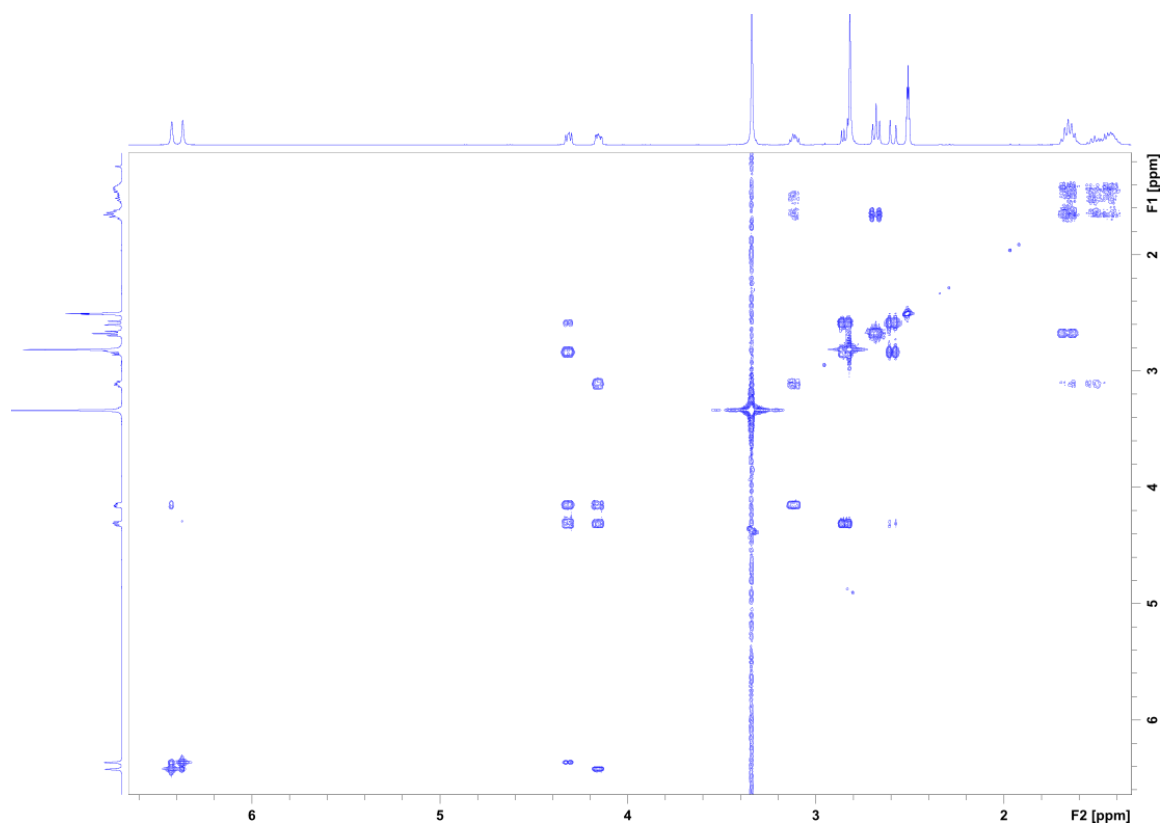

**Figure S2.** The COSY NMR spectrum of biotin-NHS ester in DMSO- $d_6$  at 298 K.

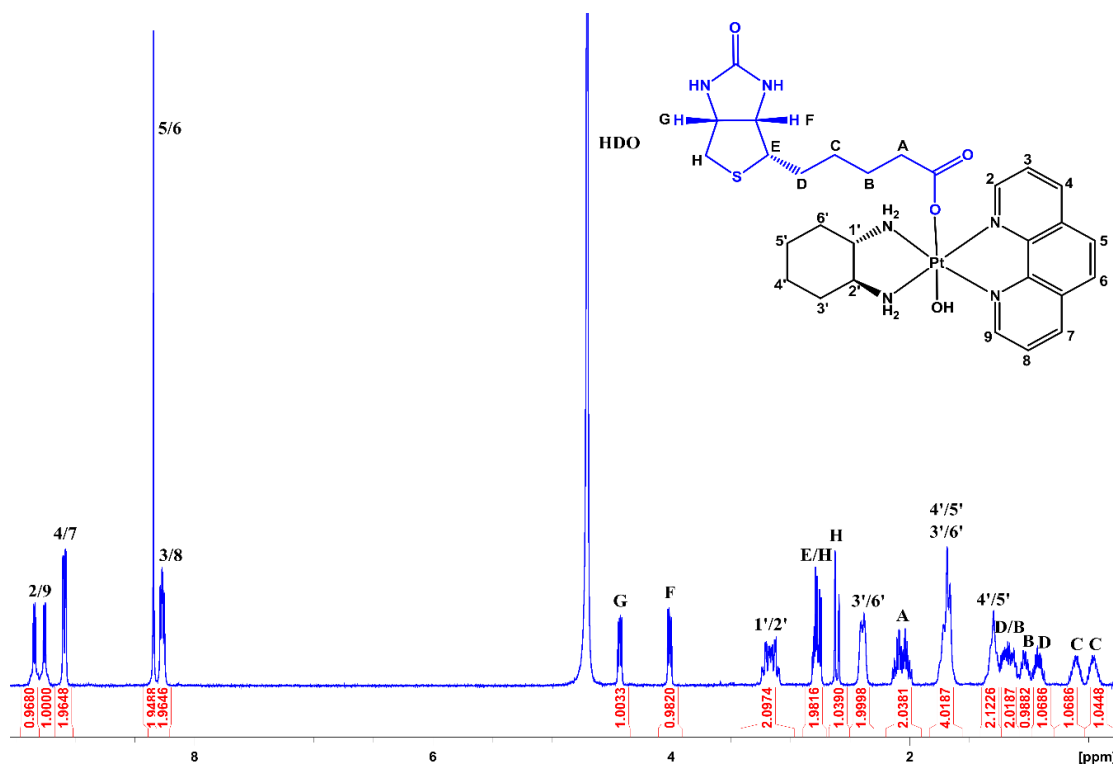

**Figure S3.** The  $^1\text{H}$  NMR spectrum of  $[\text{Pt}(\text{Phen})(\text{SSDACH})(\text{Biotin})(\text{OH})](\text{NO}_3)_2$  (**1**) in  $\text{D}_2\text{O}$  at 298 K. Insert: The chemical structure of **1** with assigned numbering.

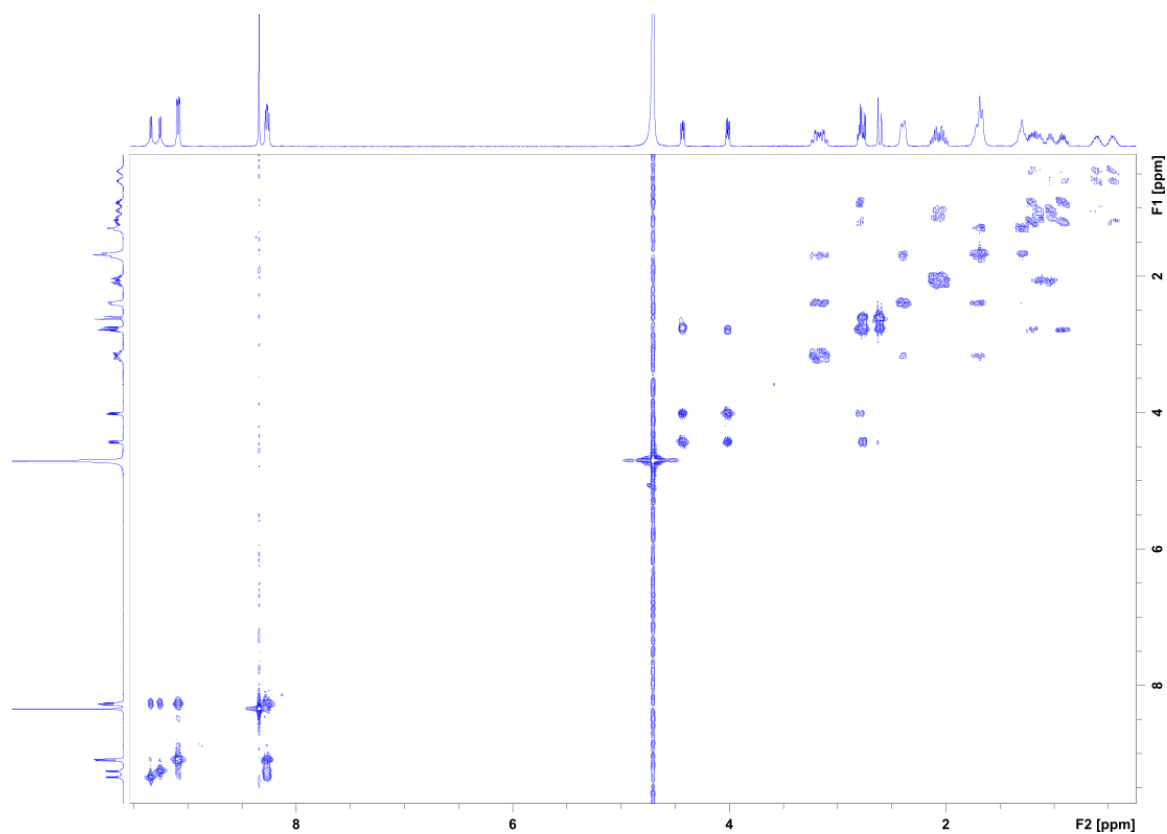

**Figure S4.** The COSY NMR spectrum of  $[\text{Pt}(\text{Phen})(\text{SSDACH})(\text{Biotin})(\text{OH})](\text{NO}_3)_2$  (**1**) in  $\text{D}_2\text{O}$  at 298 K.

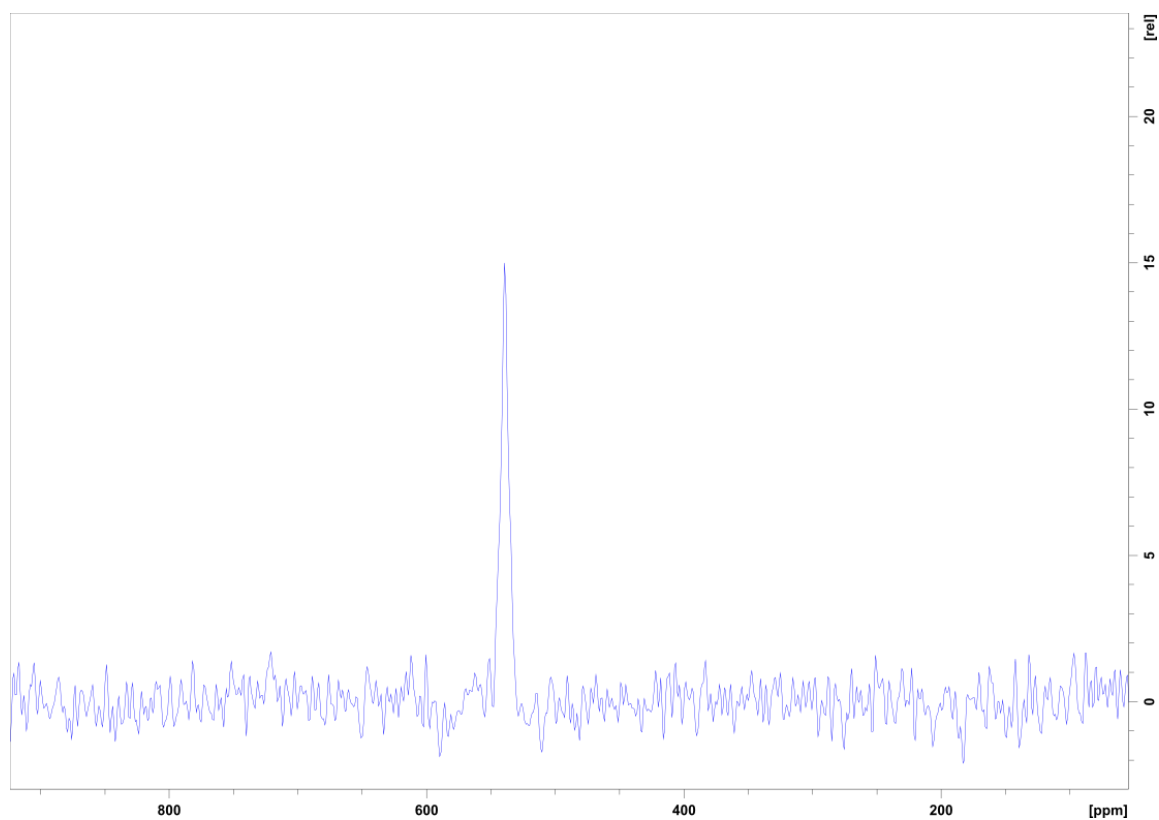

**Figure S5.** The  $^{195}\text{Pt}$  NMR spectrum of  $[\text{Pt}(\text{Phen})(\text{SSDACH})(\text{Biotin})(\text{OH})](\text{NO}_3)_2$  (**1**) in  $\text{D}_2\text{O}$  at 298 K, showing a peak at 539 ppm.

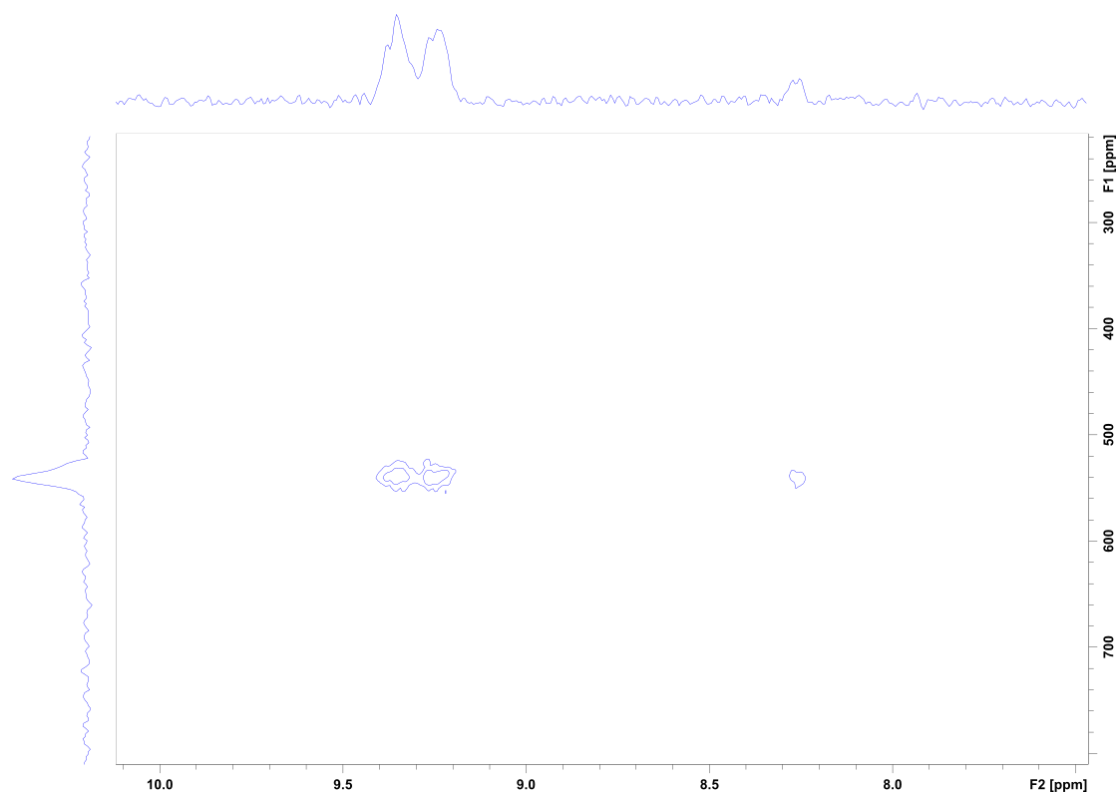

**Figure S6.** The  $^1\text{H}$ - $^{195}\text{Pt}$  HMQC NMR spectrum of  $[\text{Pt}(\text{Phen})(\text{SSDACH})(\text{Biotin})(\text{OH})](\text{NO}_3)_2$  (**1**) in  $\text{D}_2\text{O}$  at 298 K.

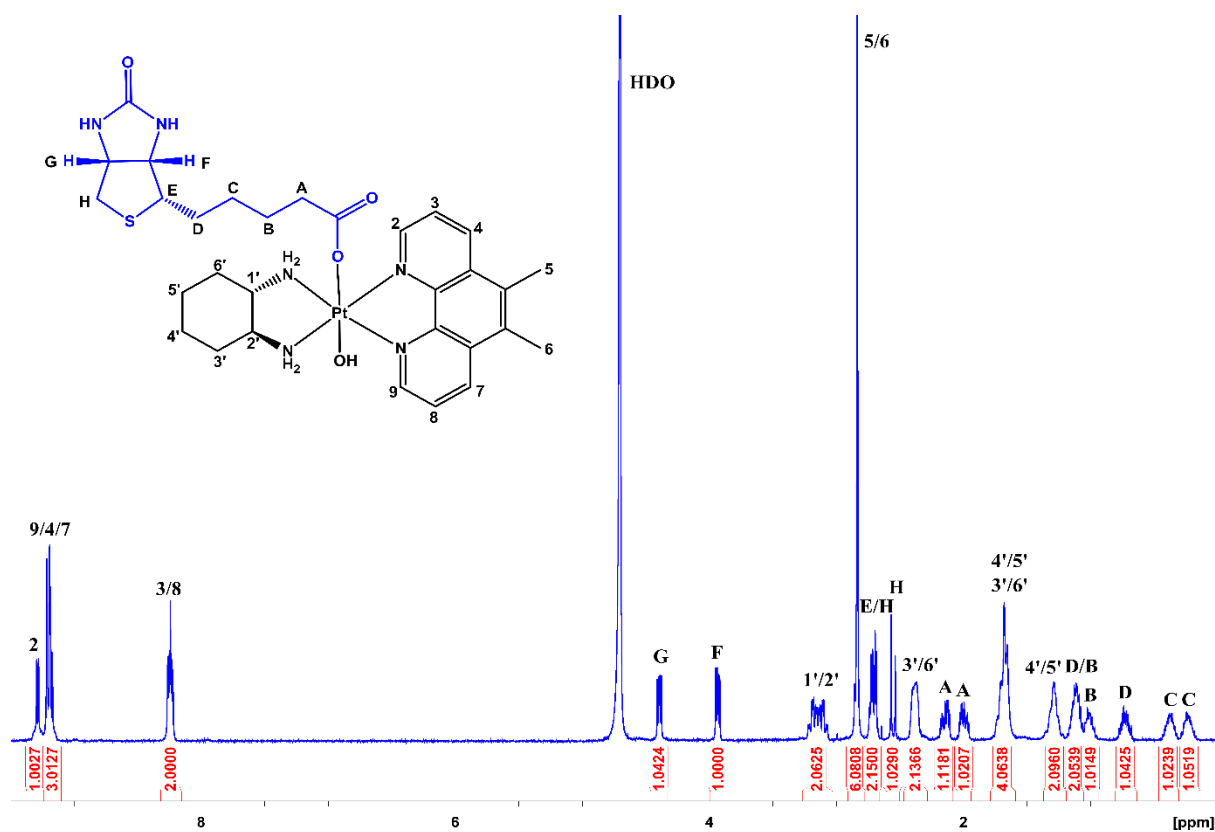

**Figure S7.** The  $^1\text{H}$  NMR spectrum of  $[\text{Pt}(56\text{Me}_2\text{Phen})(\text{SSDACH})(\text{Biotin})(\text{OH})](\text{NO}_3)_2$  (**2**) in  $\text{D}_2\text{O}$  at 298 K. Insert: The chemical structure of **2** with assigned numbering.

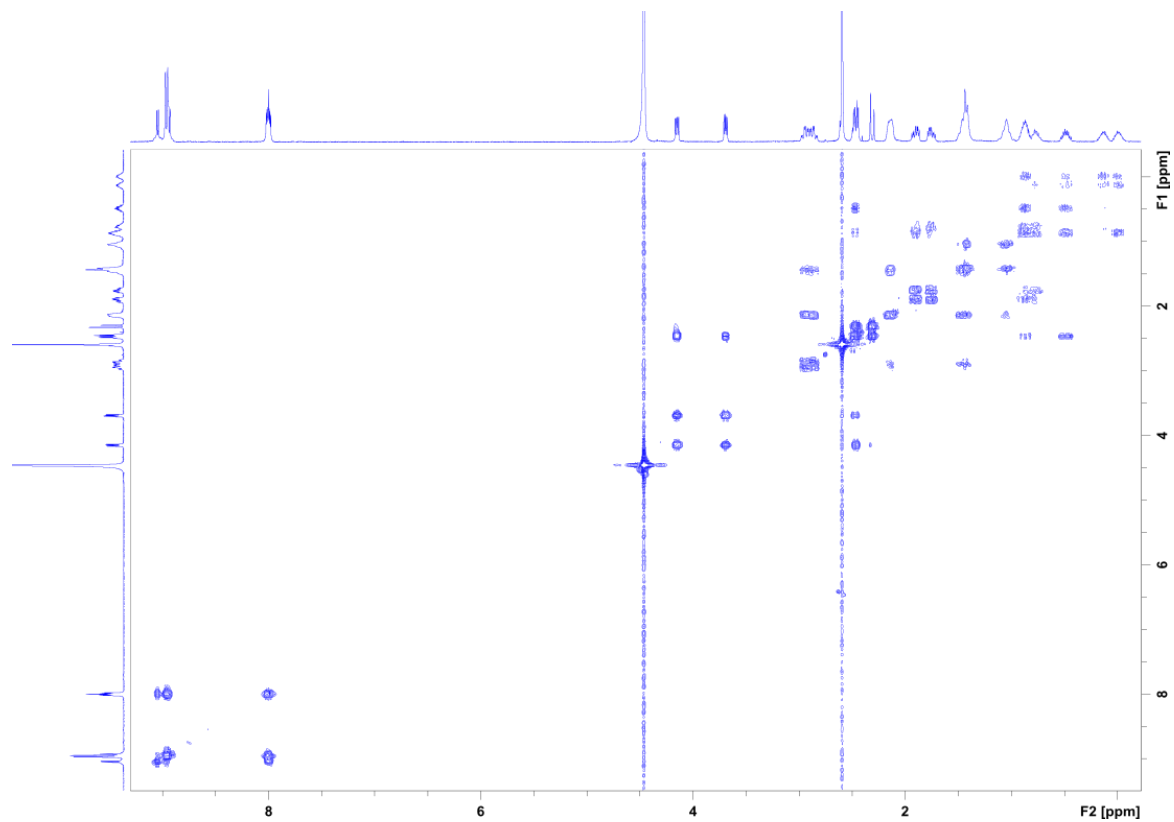

**Figure S8.** The COSY NMR spectrum of  $[\text{Pt}(56\text{Me}_2\text{Phen})(\text{SSDACH})(\text{Biotin})(\text{OH})](\text{NO}_3)_2$  (**2**) in  $\text{D}_2\text{O}$  at 298 K.

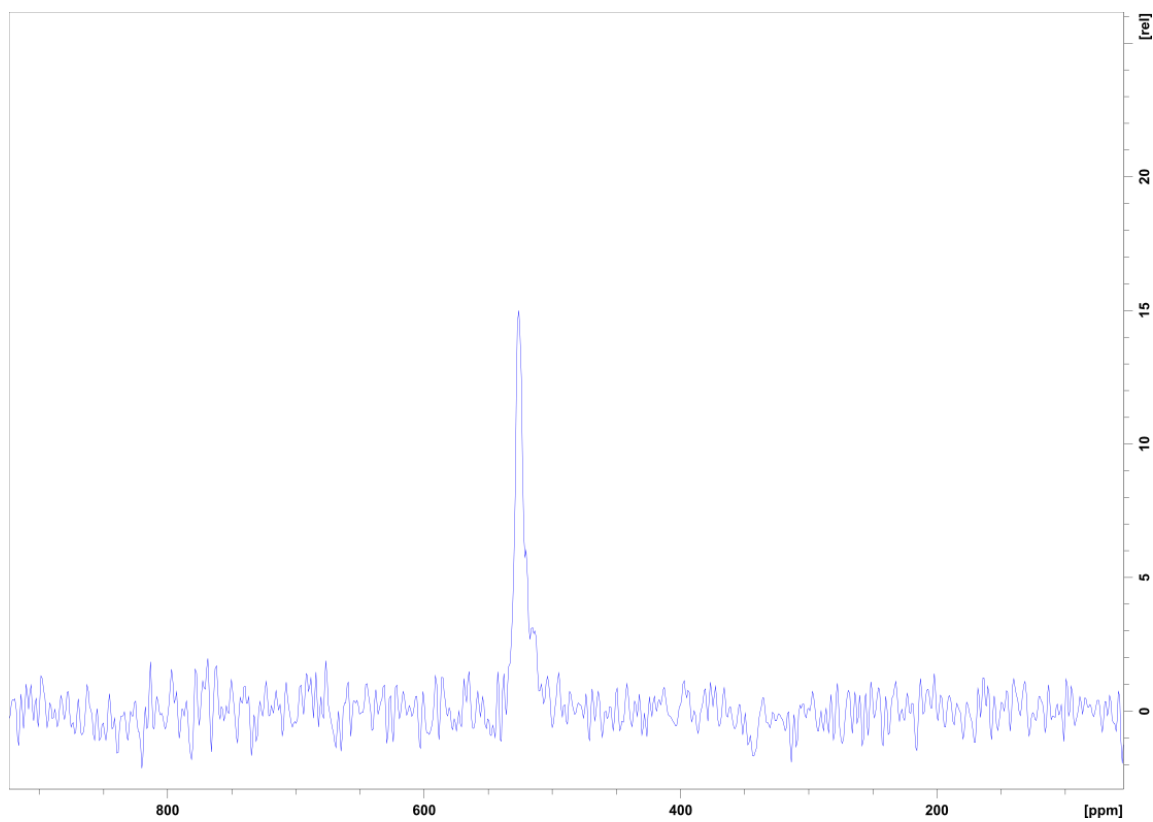

**Figure S9.** The  $^{195}\text{Pt}$  NMR spectrum of  $[\text{Pt}(56\text{Me}_2\text{Phen})(\text{SSDACH})(\text{Biotin})(\text{OH})](\text{NO}_3)_2$  (**2**) in  $\text{D}_2\text{O}$  at 298 K, showing a peak at 526 ppm.

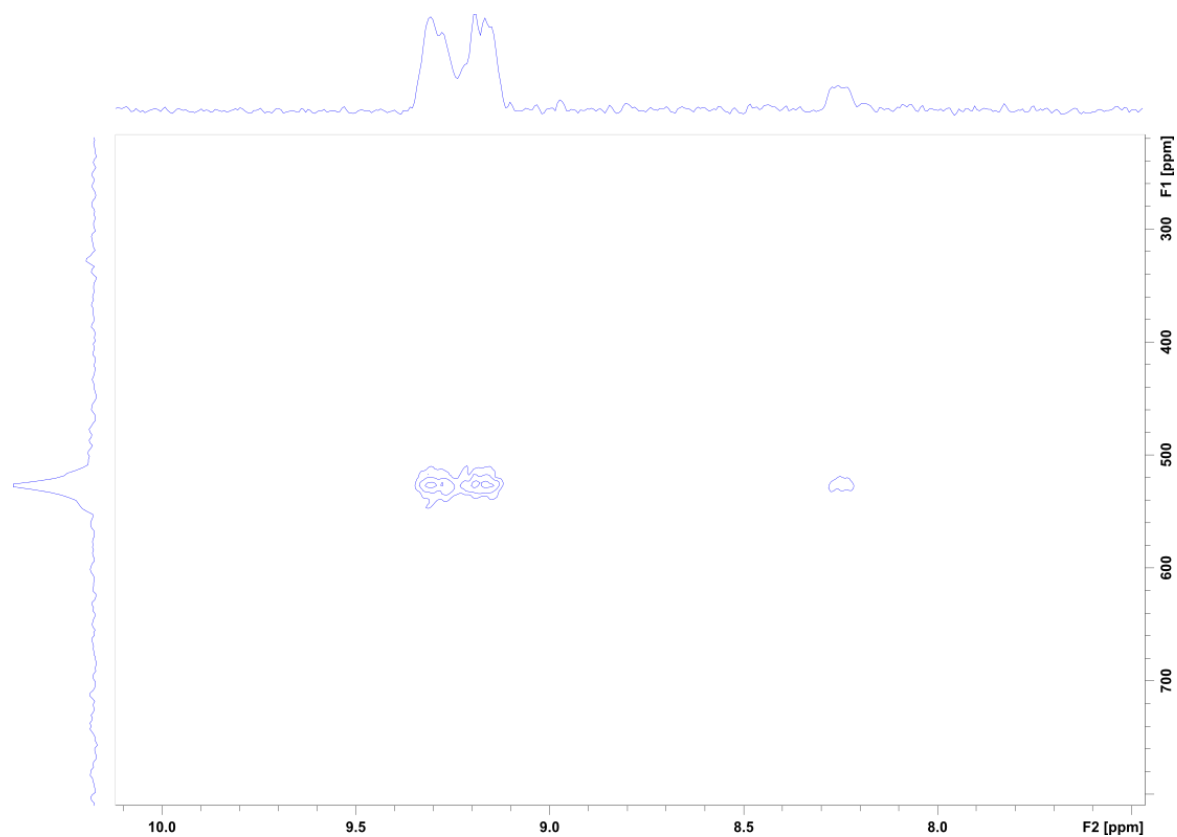

**Figure S10.** The  $^1\text{H}$ - $^{195}\text{Pt}$  HMQC NMR spectrum of  $[\text{Pt}(56\text{Me}_2\text{Phen})(\text{SSDACH})(\text{Biotin})(\text{OH})](\text{NO}_3)_2$  (2) in  $\text{D}_2\text{O}$  at 298 K.

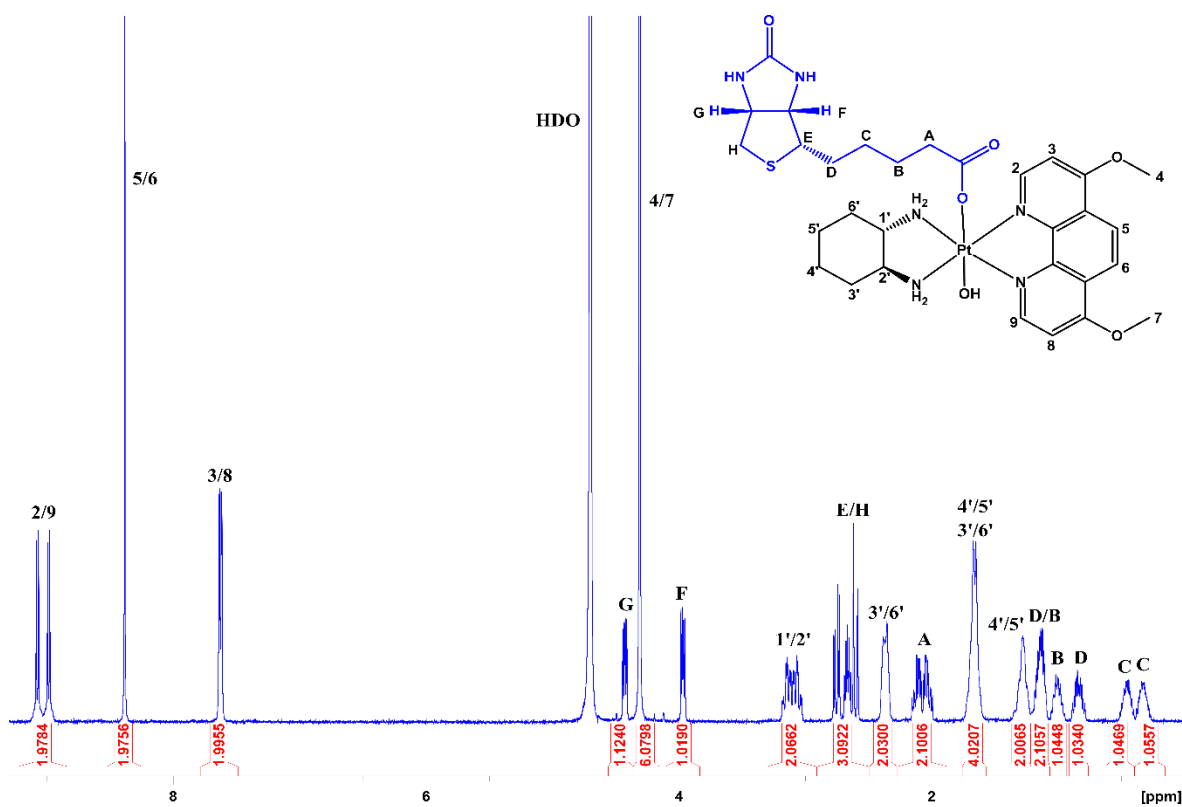

**Figure S11.** The  $^1\text{H}$  NMR spectrum of  $[\text{Pt}(47\text{O}_2\text{Me}_2\text{Phen})(\text{SSDACH})(\text{Biotin})(\text{OH})](\text{NO}_3)_2$  (3) in  $\text{D}_2\text{O}$  at 298 K. Insert: The chemical structure of 3 with assigned numbering.

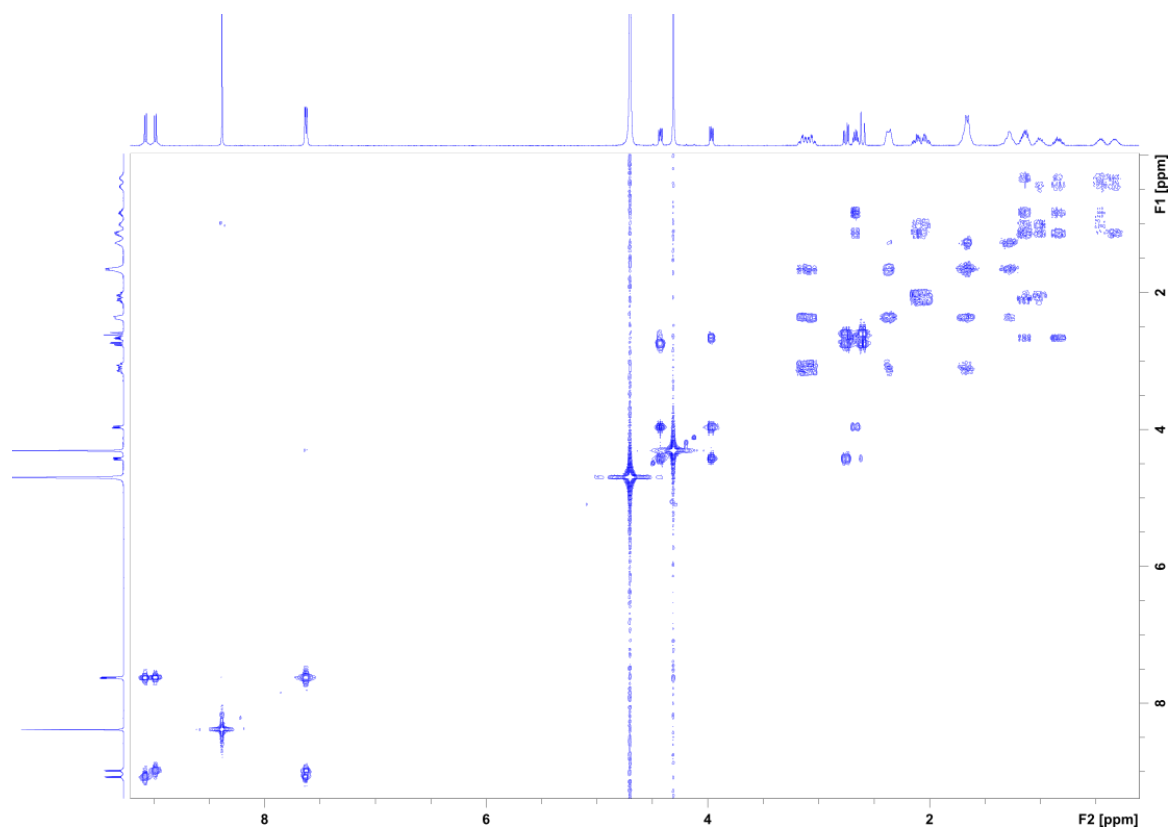

**Figure S12.** The COSY NMR spectrum of  $[\text{Pt}(47\text{O}_2\text{Me}_2\text{Phen})(\text{SSDACH})(\text{Biotin})(\text{OH})](\text{NO}_3)_2$  (**3**) in  $\text{D}_2\text{O}$  at 298 K.

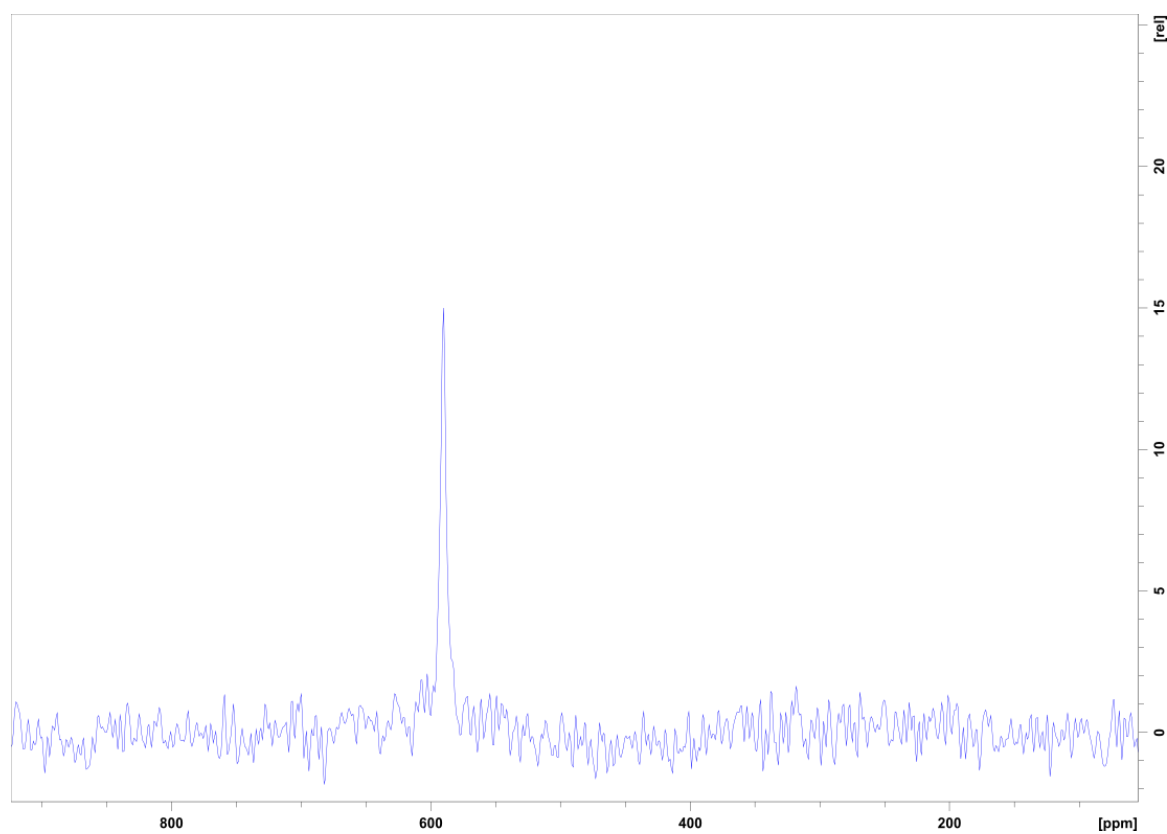

**Figure S13.** The  $^{195}\text{Pt}$  NMR spectrum of  $[\text{Pt}(47\text{O}_2\text{Me}_2\text{Phen})(\text{SSDACH})(\text{Biotin})(\text{OH})](\text{NO}_3)_2$  (**3**) in  $\text{D}_2\text{O}$  at 298 K, showing a peak at 590 ppm.

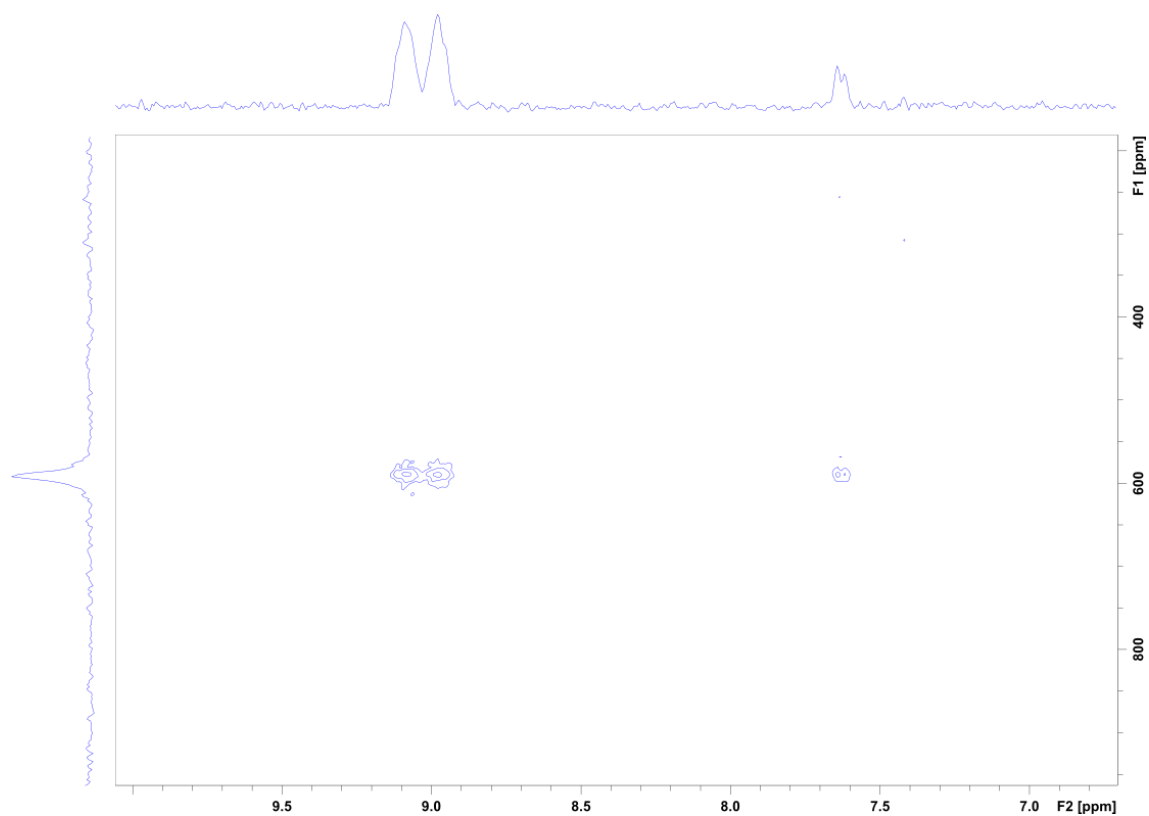

**Figure S14.** The  $^1\text{H}$ - $^{195}\text{Pt}$  HMQC NMR spectrum of  $[\text{Pt}(47\text{O}_2\text{Me}_2\text{Phen})(\text{SSDACH})(\text{Biotin})(\text{OH})](\text{NO}_3)_2$  (**3**) in  $\text{D}_2\text{O}$  at 298 K.

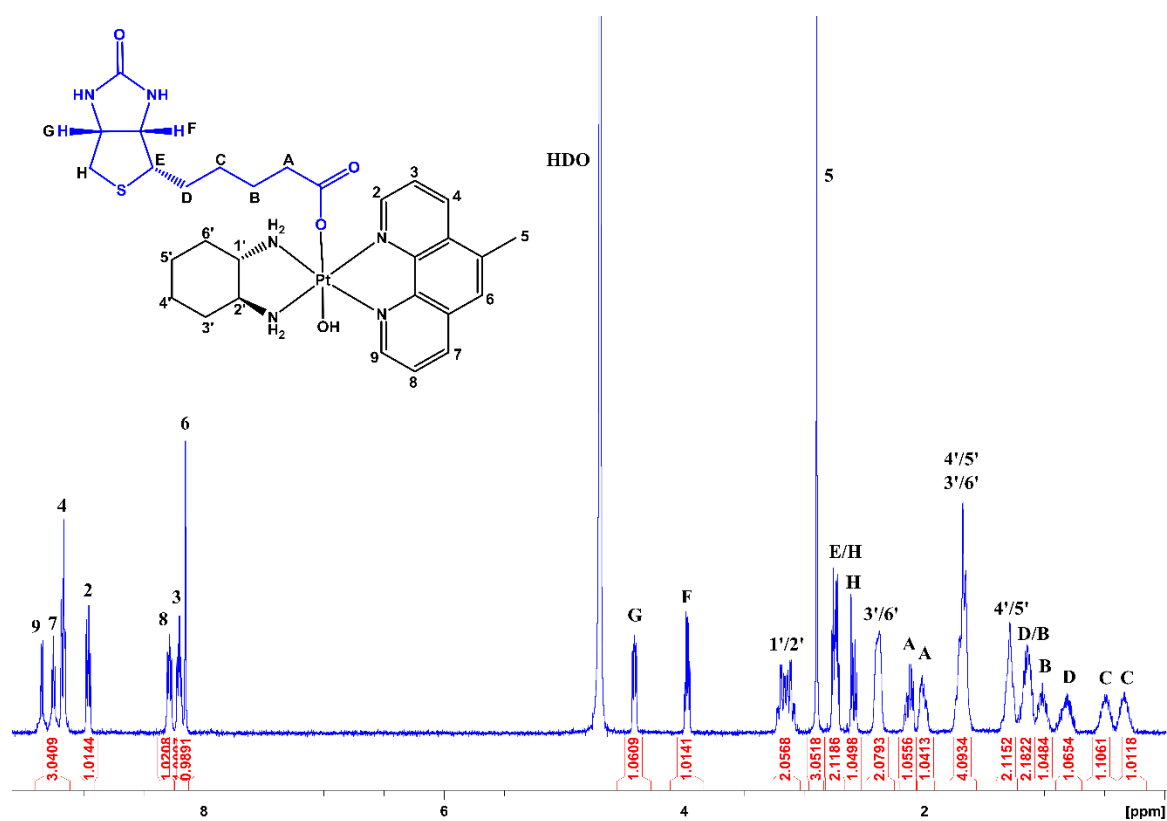

**Figure S15.** The  $^1\text{H}$  NMR spectrum of  $[\text{Pt}(5\text{MePhen})(\text{SSDACH})(\text{Biotin})(\text{OH})](\text{NO}_3)_2$  (**4**) in  $\text{D}_2\text{O}$  at 298 K. Insert: The chemical structure of **4** with assigned numbering.



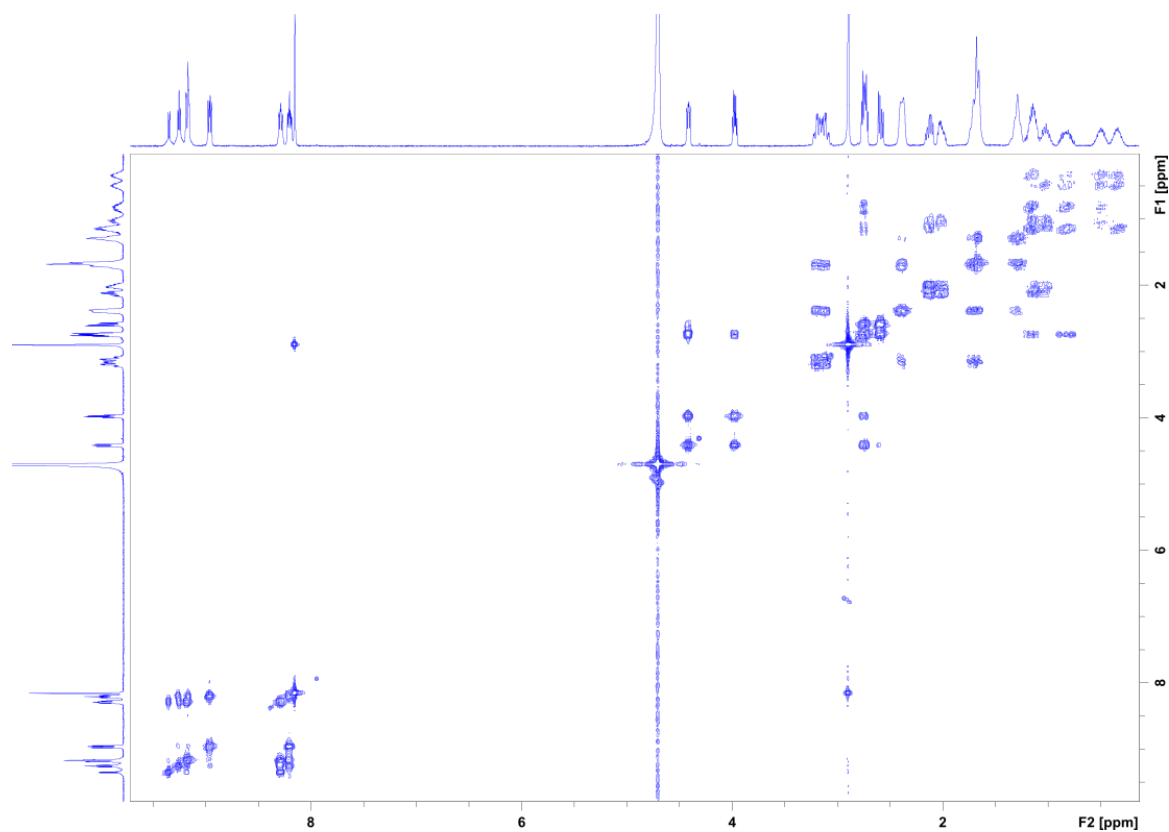

**Figure S16.** The COSY NMR spectrum of  $[\text{Pt}(\text{5MePhen})(\text{SSDACH})(\text{Biotin})(\text{OH})](\text{NO}_3)_2$  (**4**) in  $\text{D}_2\text{O}$  at 298 K.

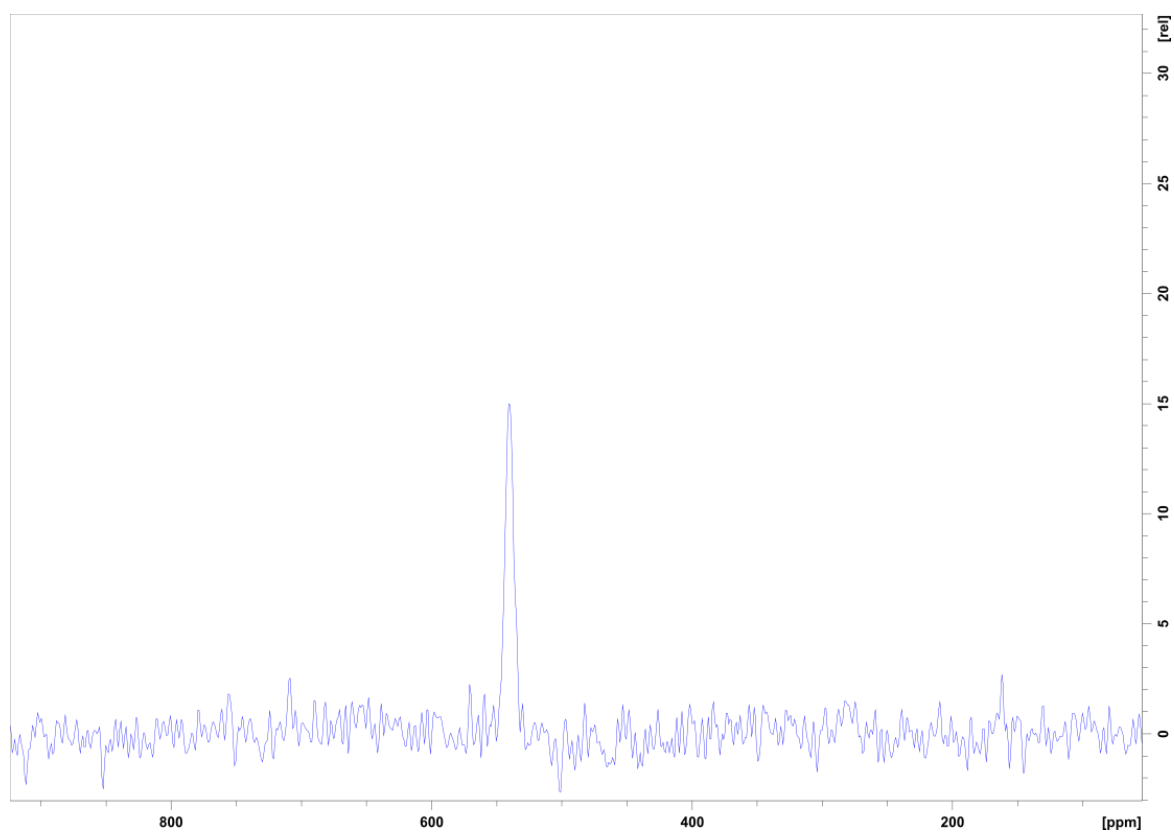

**Figure S17.** The  $^{195}\text{Pt}$  NMR spectrum of  $[\text{Pt}(\text{5MePhen})(\text{SSDACH})(\text{Biotin})(\text{OH})](\text{NO}_3)_2$  (**4**) in  $\text{D}_2\text{O}$  at 298 K, showing a peak at 540 ppm.

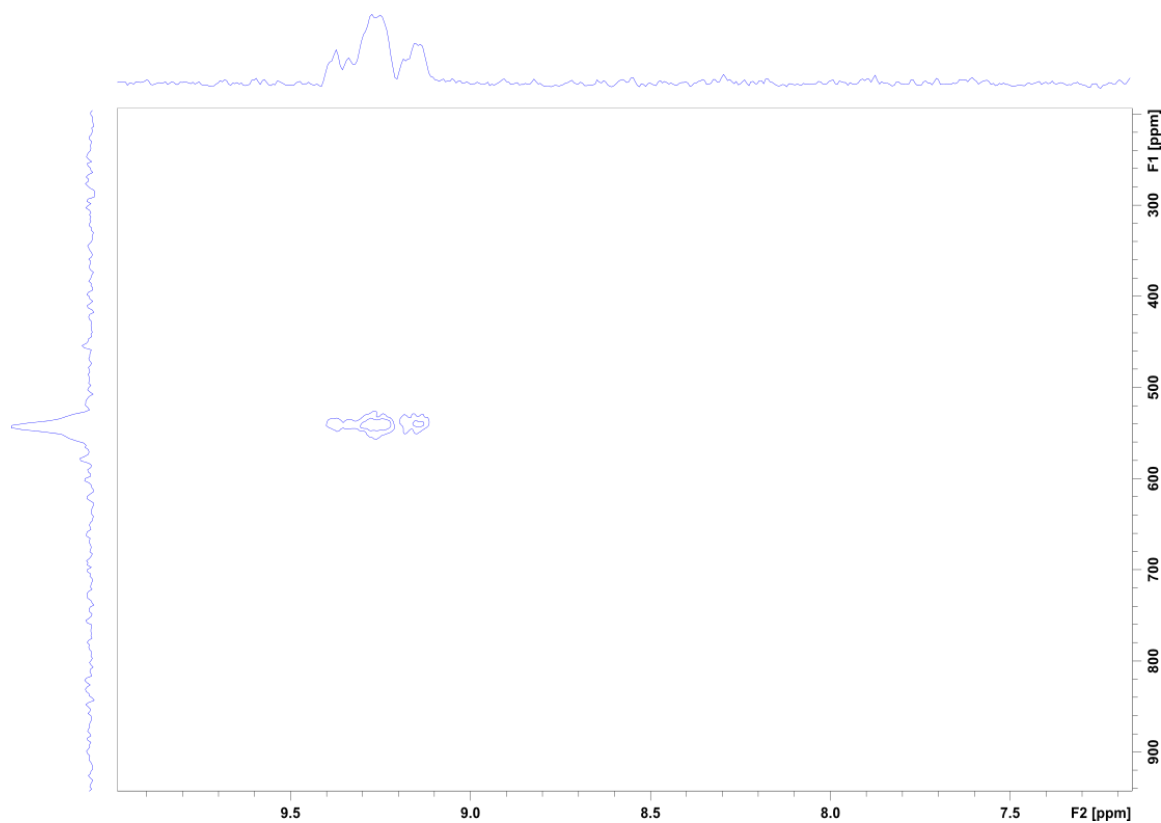

**Figure S18.** The  $^1\text{H}$ - $^{195}\text{Pt}$  HMQC NMR spectrum of  $[\text{Pt}(\text{5MePhen})(\text{SSDACH})(\text{Biotin})(\text{OH})](\text{NO}_3)_2$  (**4**) in  $\text{D}_2\text{O}$  at 298 K.

#### 4. HPLC

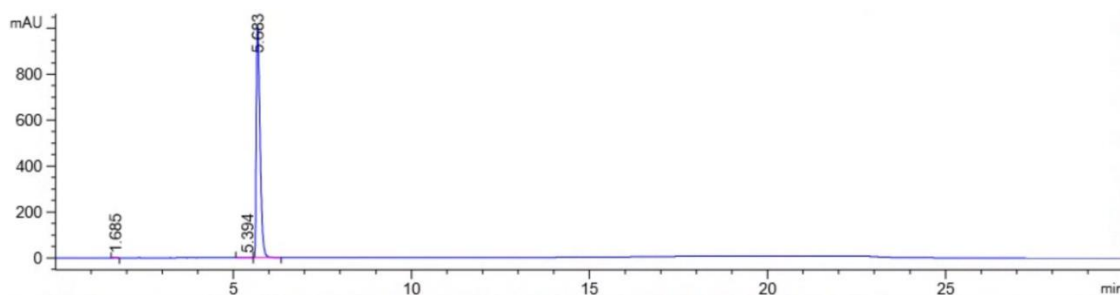

**Figure S19.** The HPLC chromatogram of  $[\text{Pt}(\text{Phen})(\text{SSDACH})(\text{Biotin})(\text{OH})](\text{NO}_3)_2$  (**1**), at 254 nm, at a gradient of 0–100% (ACN: $\text{H}_2\text{O}$ , 9:1) over 15 min.

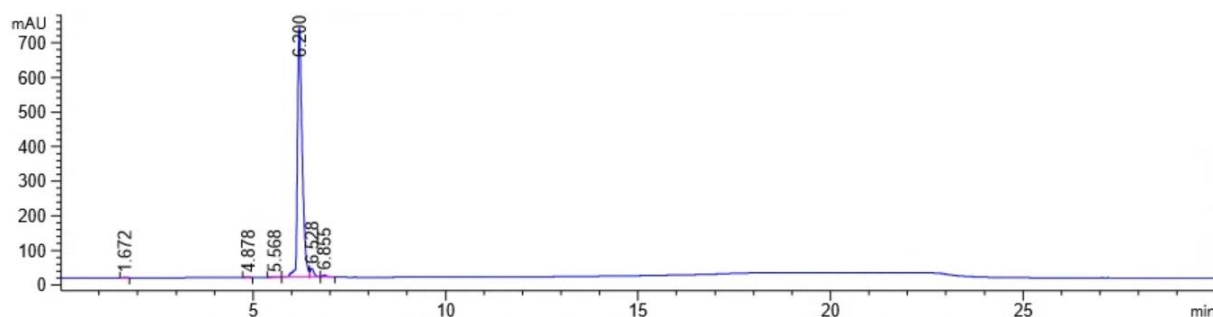

**Figure S20.** The HPLC chromatogram of  $[\text{Pt}(\text{56Me}_2\text{Phen})(\text{SSDACH})(\text{Biotin})(\text{OH})](\text{NO}_3)_2$  (**2**), at 254 nm, at a gradient of 0–100% (ACN: $\text{H}_2\text{O}$ , 9:1) over 15 min.

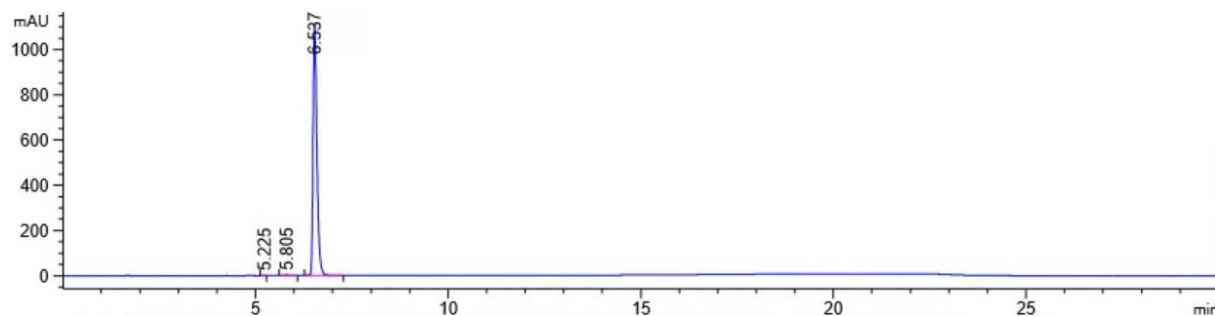

**Figure S21.** The HPLC chromatogram of  $[\text{Pt}(\text{47O}_2\text{Me}_2\text{Phen})(\text{SSDACH})(\text{Biotin})(\text{OH})](\text{NO}_3)_2$  (**3**), at 254 nm, at a gradient of 0–100% (ACN:H<sub>2</sub>O, 9:1) over 15 min.

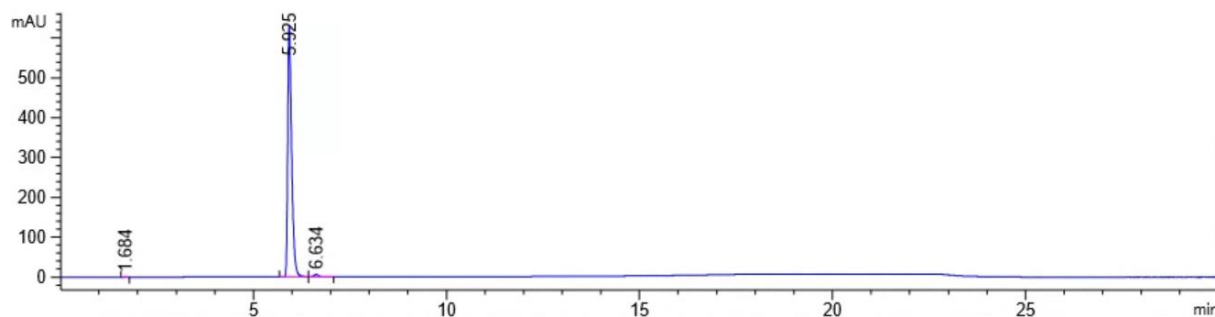

**Figure S22.** The HPLC chromatogram of  $[\text{Pt}(\text{5MePhen})(\text{SSDACH})(\text{Biotin})(\text{OH})](\text{NO}_3)_2$  (**4**), at 254 nm, at a gradient of 0–100% (ACN:H<sub>2</sub>O, 9:1) over 15 min.

## 5. ESI-MS

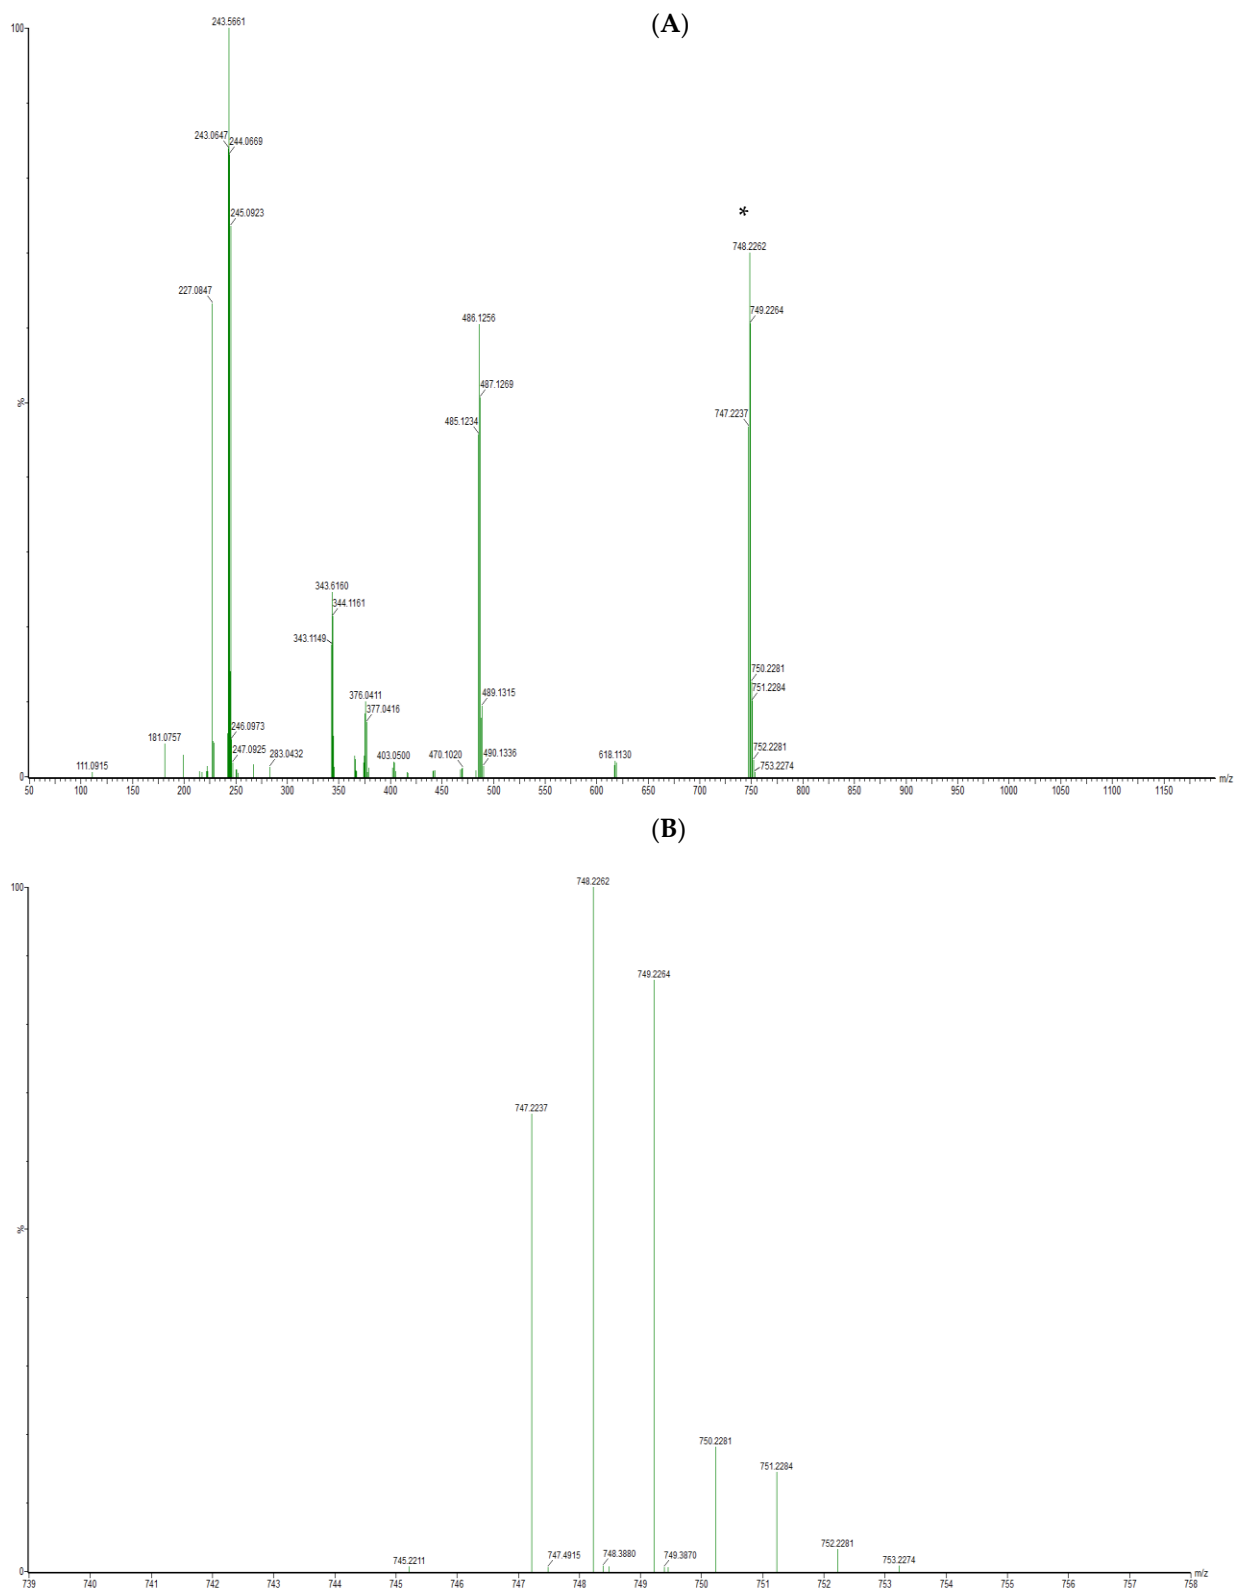

**Figure S23.** (A) Full ESI-MS spectrum of  $[Pt(Phen)(SSDACH)(Biotin)(OH)](NO_3)_2$  (**1**). (B) The expanded region of the  $[M-H]^+$  peak.

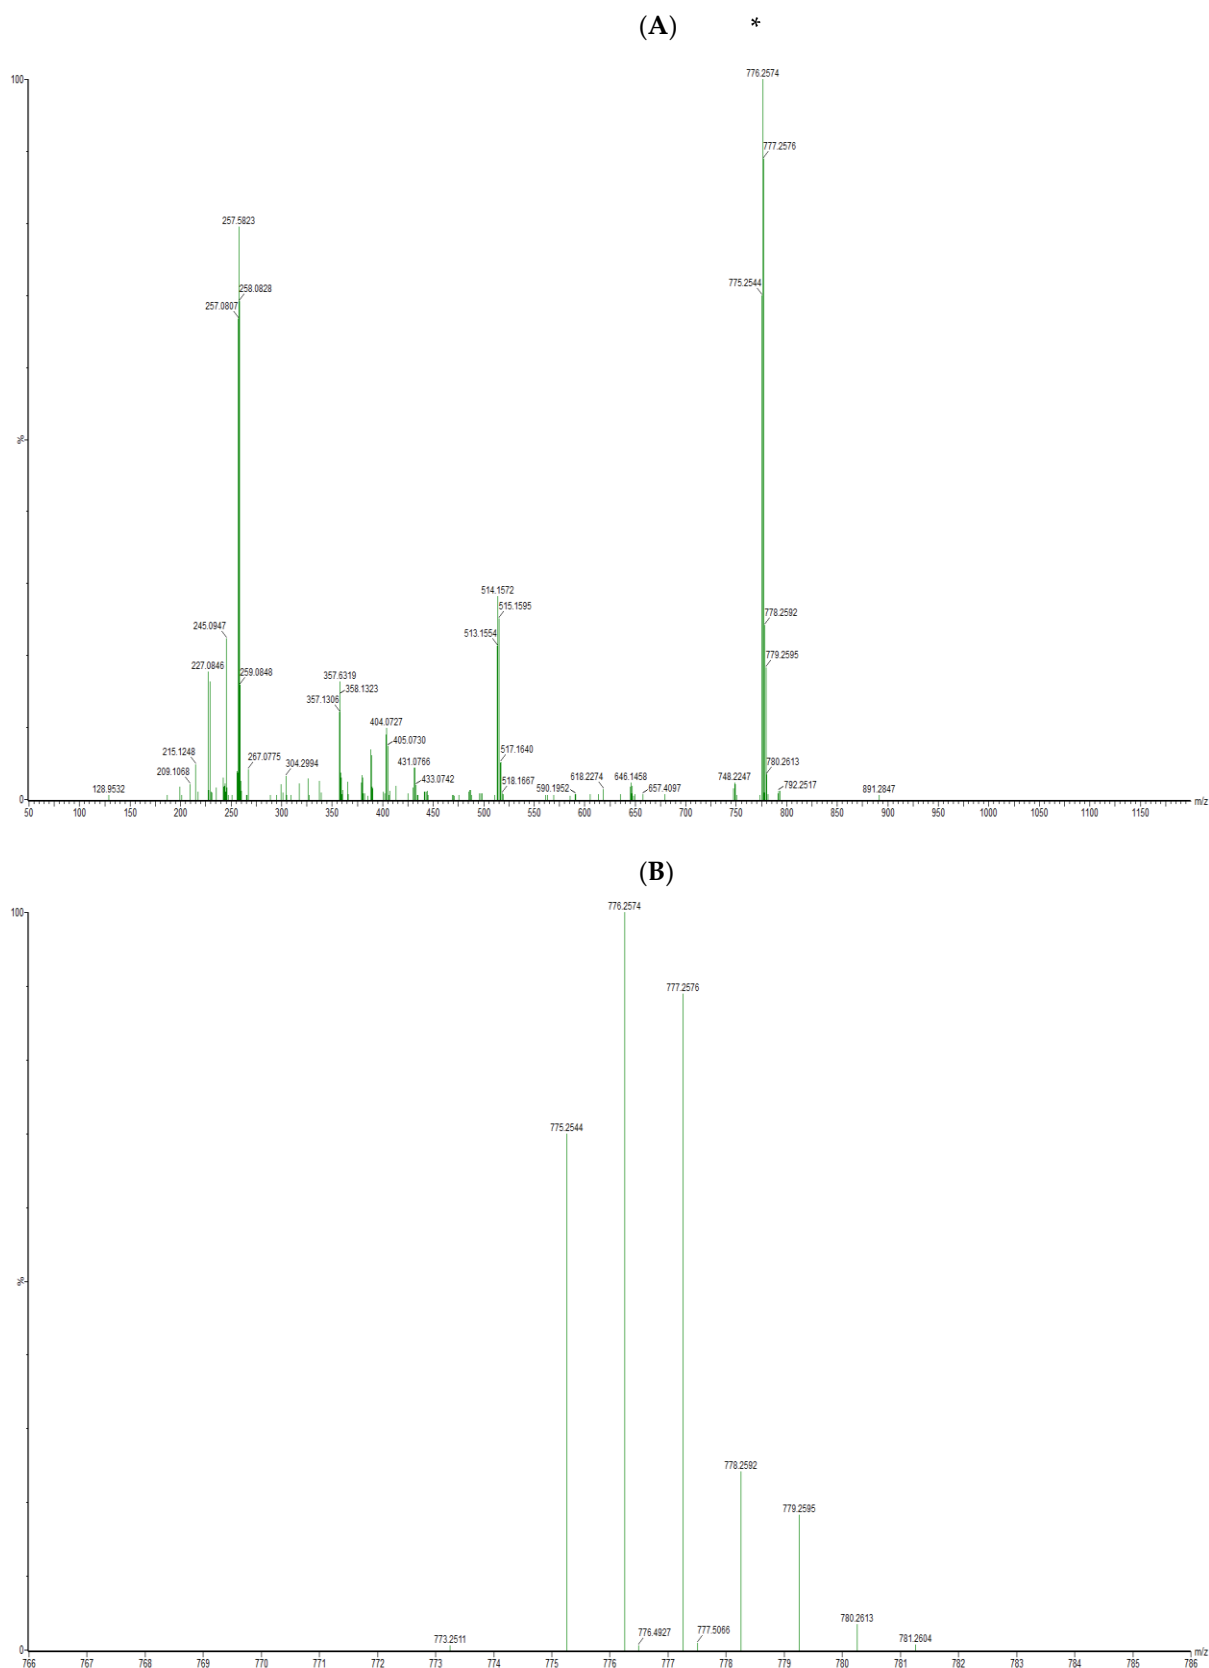

**Figure S24.** (A) Full ESI-MS spectrum of  $[Pt(56Me_2Phen)(SSDACH)(Biotin)(OH)](NO_3)_2$  (**2**). (B) The expanded region of the  $[M-H]^+$  peak.

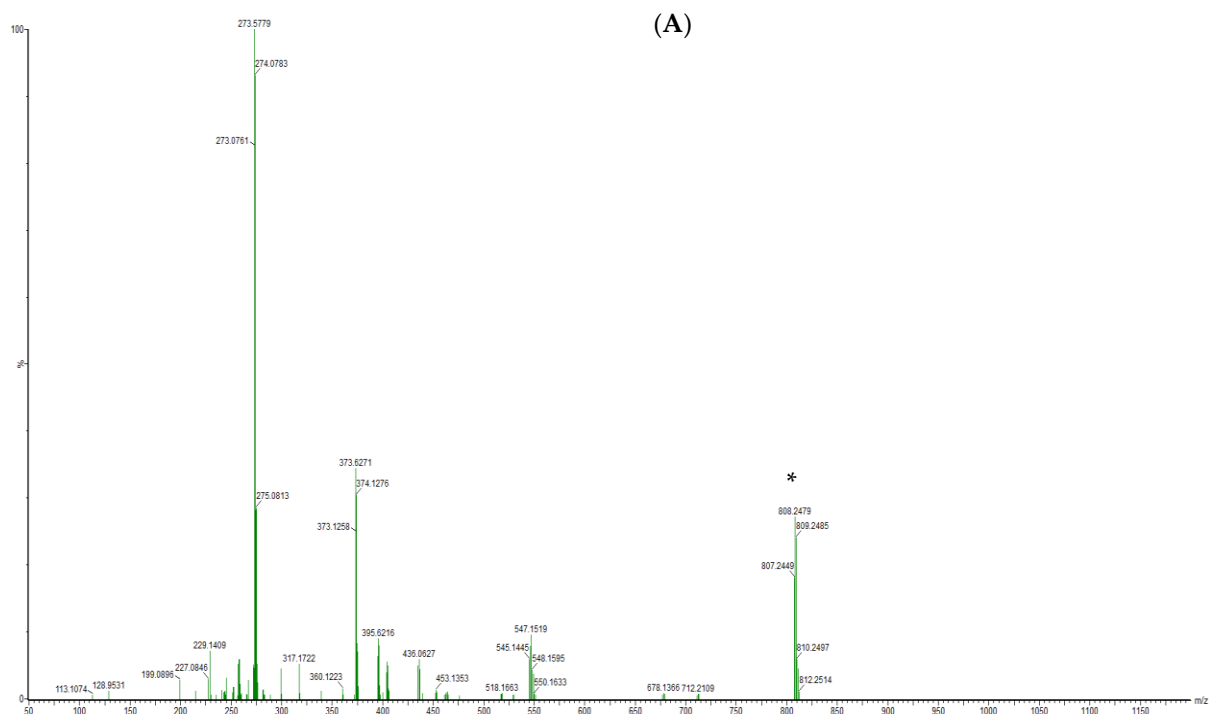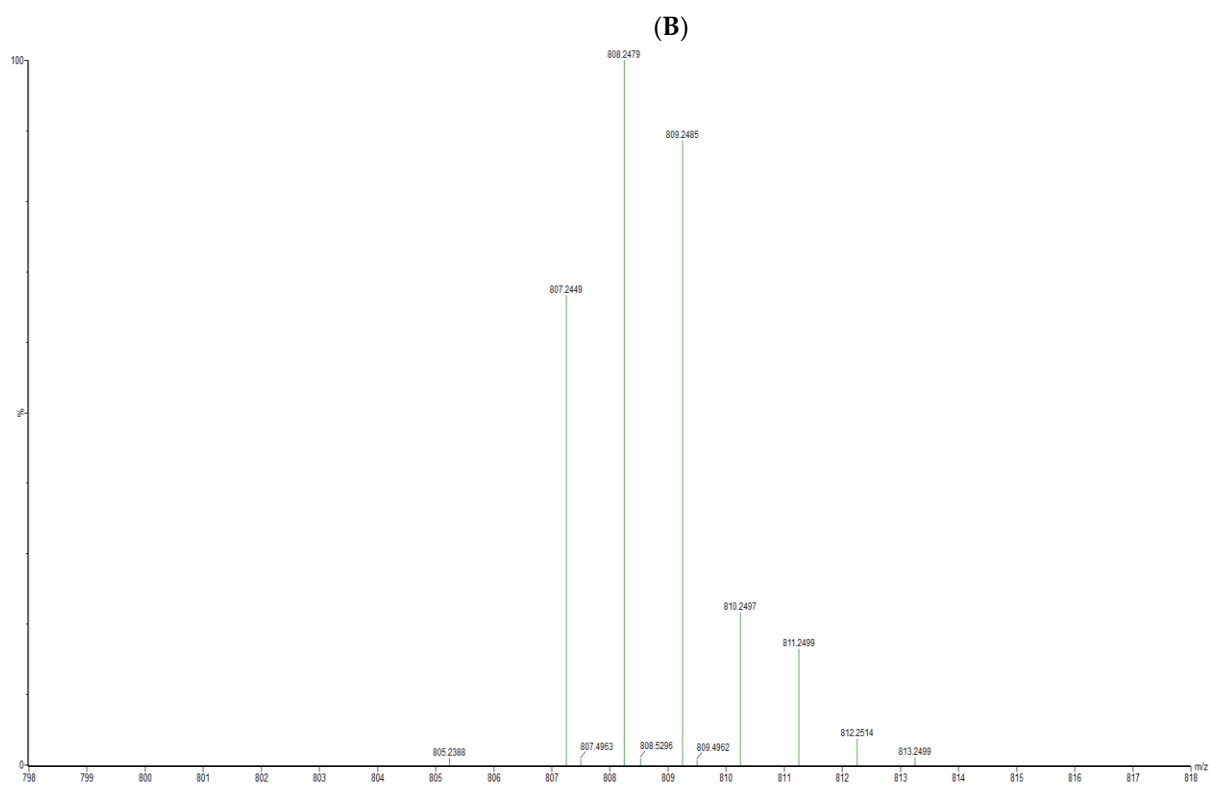

**Figure S25.** (A) Full ESI-MS spectrum of  $[\text{Pt}(\text{47O}_2\text{Me}_2\text{Phen})(\text{SSDACH})(\text{Biotin})(\text{OH})](\text{NO}_3)_2$  (**3**). (B) The expanded region of the  $[\text{M}-\text{H}]^+$  peak.

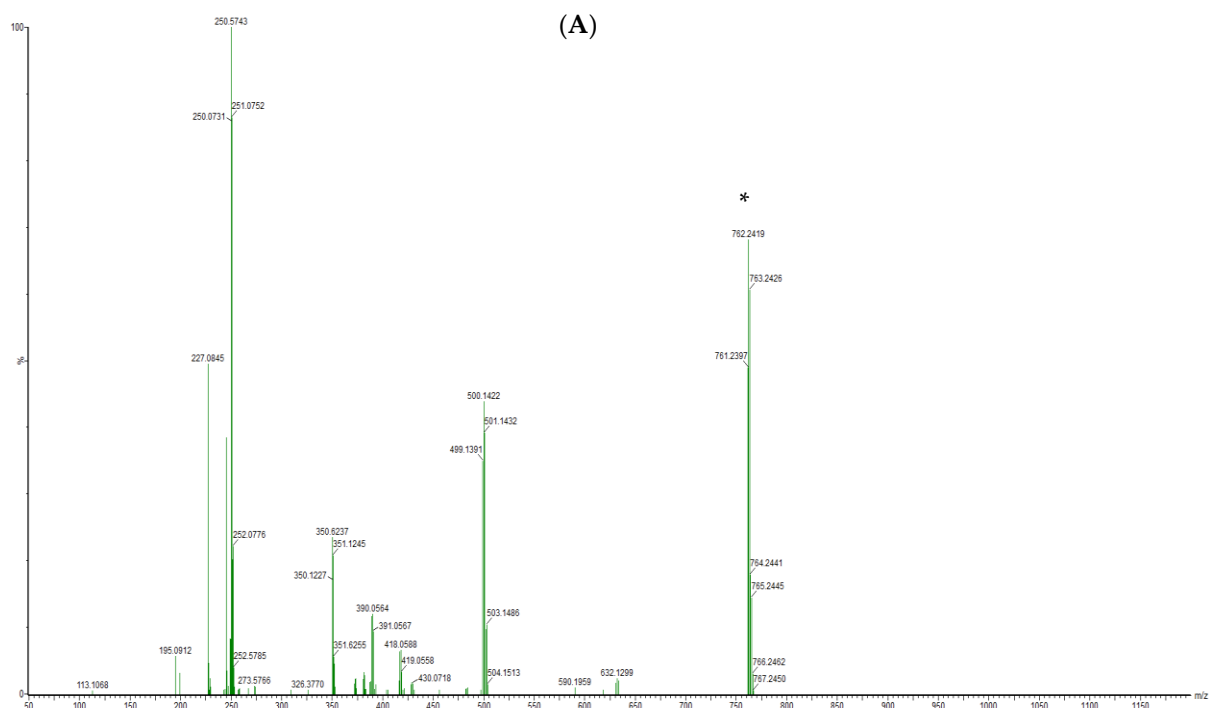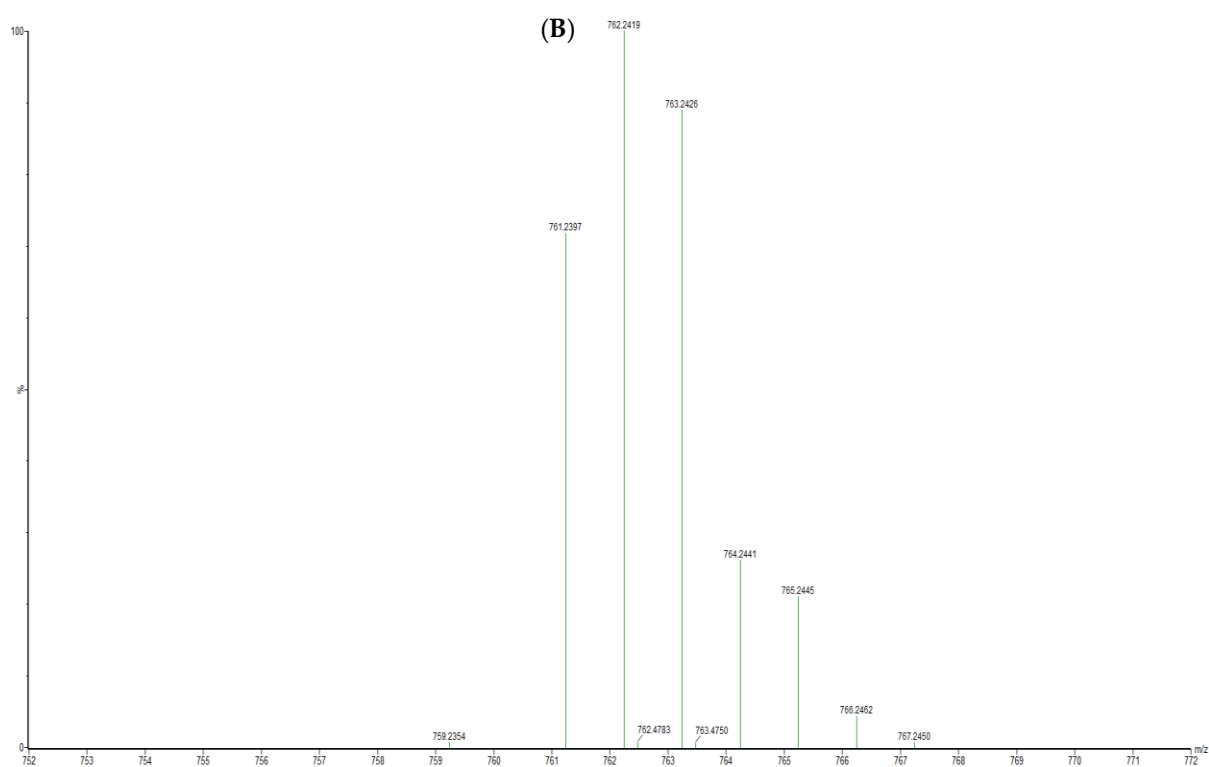

**Figure S26.** (A) Full ESI-MS spectrum of  $[\text{Pt}(\text{5MePhen})(\text{SSDACH})(\text{Biotin})(\text{OH})](\text{NO}_3)_2$  (**4**). (B) The expanded region of the  $[\text{M-H}]^+$  peak.

## 7. Summary of Characterisation Data

**Table S3.** Summary of characterisation data for **1–4**.

| Complex  | Molecular Formula                                                  | Yield (%) | HRMS-ESI: Calc. [M-N <sub>2</sub> O <sub>6</sub> -H] <sup>+</sup> <i>m/z</i><br>(found). | Electronic spectrum $\lambda_{\text{max}}$ nm ( $\epsilon/\text{M}^{-1} \text{ cm}^{-1}$ )           | CD $\lambda_{\text{max}}$ nm (mdeg mol L <sup>-1</sup> ) | HPLC purity (%) |
|----------|--------------------------------------------------------------------|-----------|------------------------------------------------------------------------------------------|------------------------------------------------------------------------------------------------------|----------------------------------------------------------|-----------------|
| <b>1</b> | C <sub>28</sub> H <sub>38</sub> N <sub>8</sub> O <sub>10</sub> PtS | 66        | 748.2245 (748.2262)                                                                      | 204 (70,400 ± 180), 279 (25,300 ± 70), 306 (6200 ± 85)                                               | 212 (-2.8), 276 (-0.4)                                   | 99.7            |
| <b>2</b> | C <sub>30</sub> H <sub>42</sub> N <sub>8</sub> O <sub>10</sub> PtS | 64        | 776.2558 (776.2574)                                                                      | 206 (75,900 ± 360), 290 (26,800 ± 170), 318 (6700 ± 30)                                              | 212 (-2.6), 243 (-0.6), 256 (0.1), 286 (-0.6)            | 95.7            |
| <b>3</b> | C <sub>30</sub> H <sub>42</sub> N <sub>8</sub> O <sub>12</sub> PtS | 62        | 808.2456 (808.2479)                                                                      | 194 (110,400 ± 190), 212 (103,200 ± 130), 267 (60,100 ± 130),<br>280 (38,100 ± 320), 347 (8200 ± 15) | 214 (-2.7), 247 (0.1), 268 (-0.5), 305 (0.5)             | 99.6            |
| <b>4</b> | C <sub>29</sub> H <sub>40</sub> N <sub>8</sub> O <sub>10</sub> PtS | 65        | 762.2401 (762.2419)                                                                      | 206 (72,400 ± 310), 284 (25,800 ± 160), 312 (6500 ± 50)                                              | 212 (-1.8), 242 (-0.3), 251 (0.3), 284 (-0.3)            | 98.8            |



## 8. UV Spectra

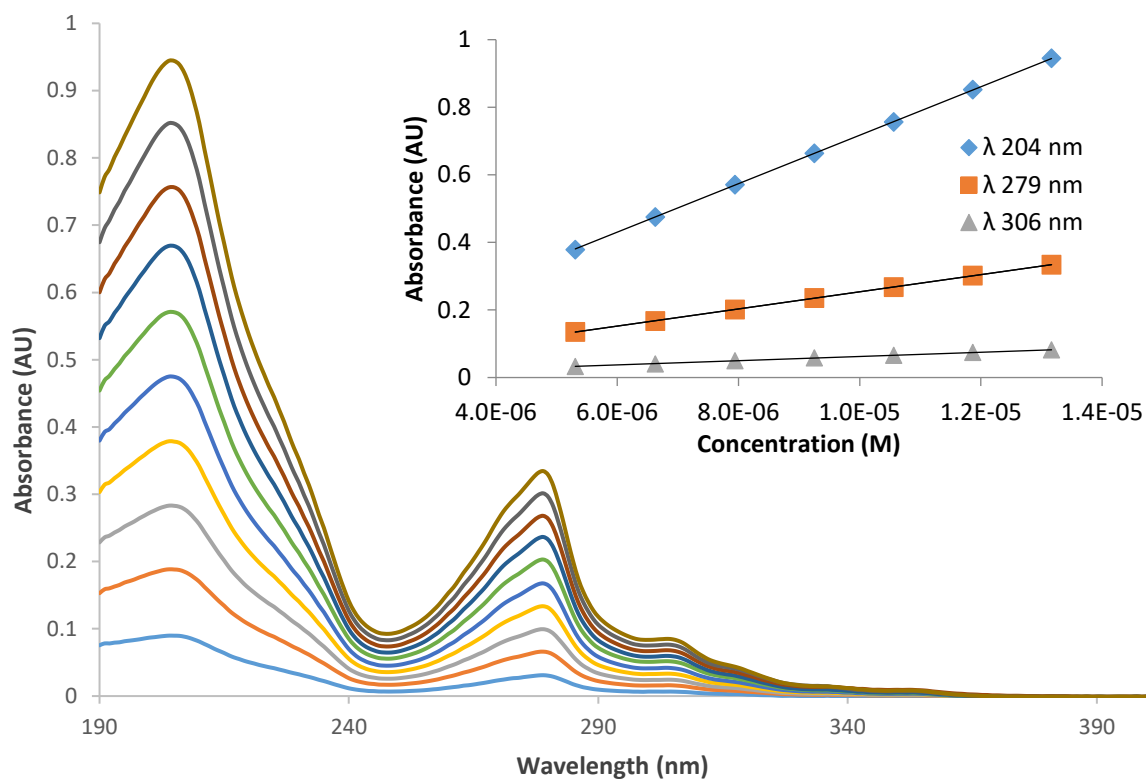

**Figure S27.** The UV spectrum of a replicate of  $[\text{Pt}(\text{Phen})(\text{SSDACH})(\text{Biotin})(\text{OH})](\text{NO}_3)_2$  (1) in water.

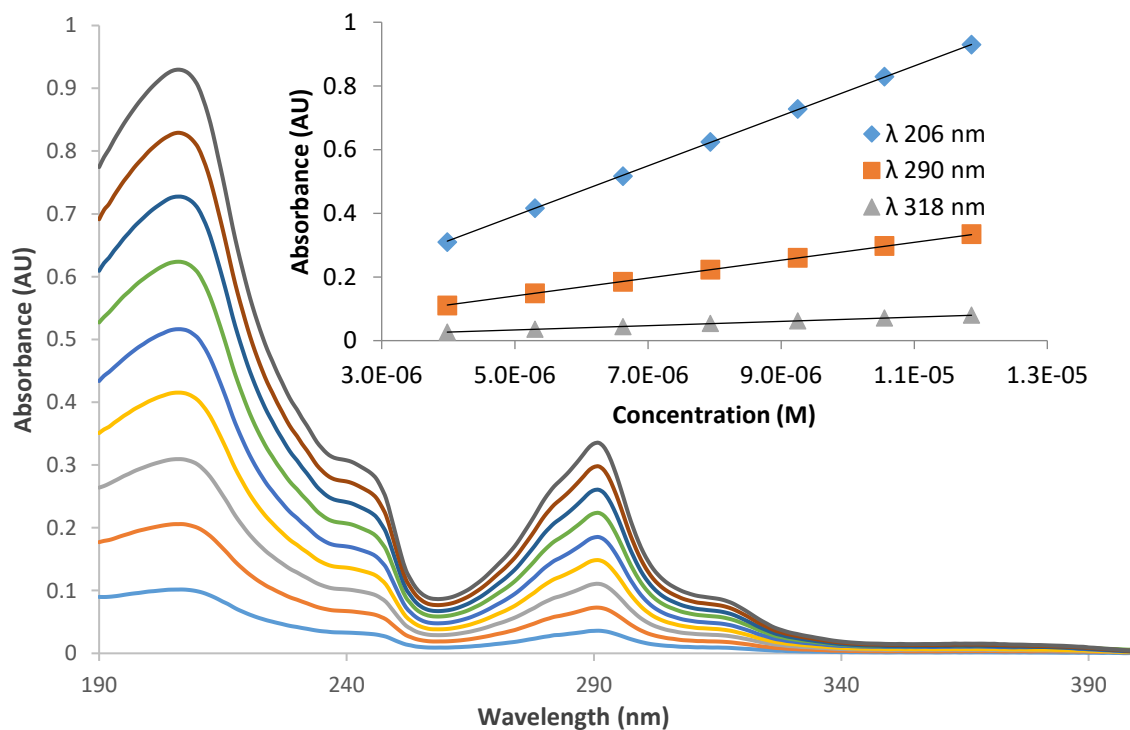

**Figure S28.** The UV spectrum of a replicate of  $[\text{Pt}(56\text{Me}_2\text{Phen})(\text{SSDACH})(\text{Biotin})(\text{OH})](\text{NO}_3)_2$  (2) in water.

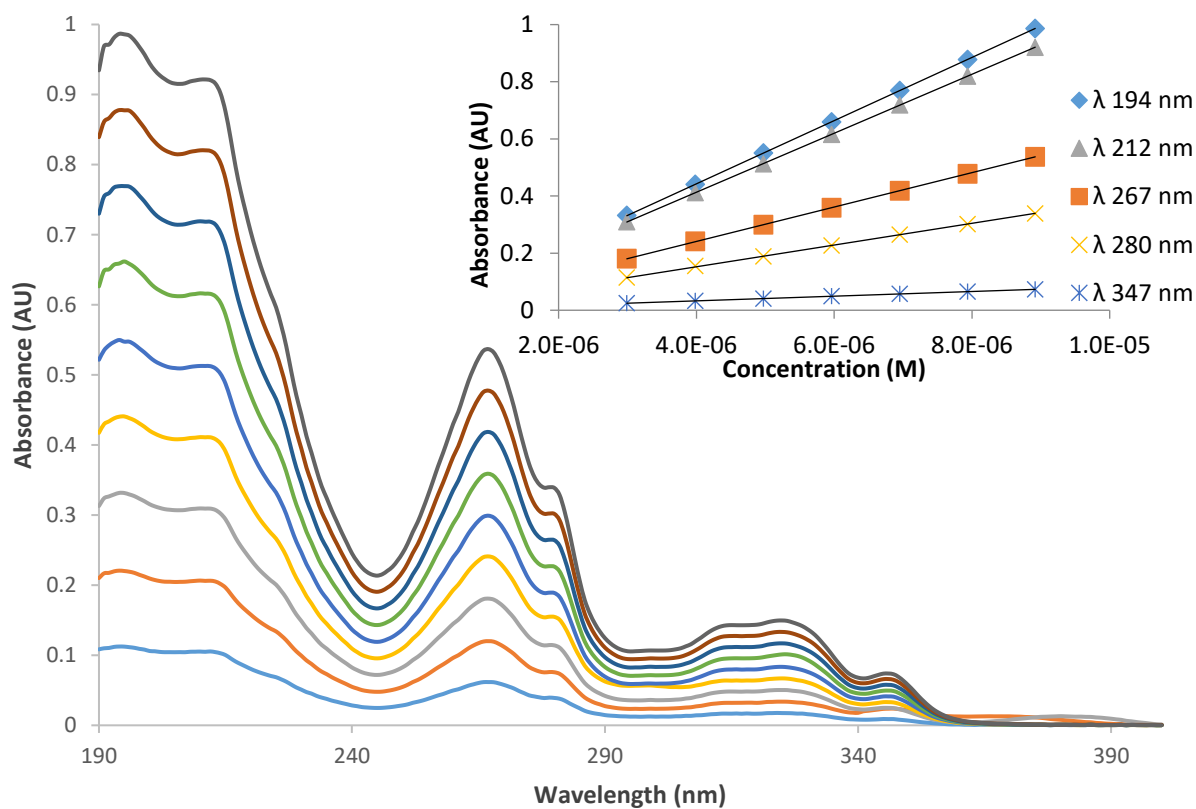

**Figure S29.** The UV spectrum of a replicate of  $[\text{Pt}(47\text{O}_2\text{Me}_2\text{Phen})(\text{SSDACH})(\text{Biotin})(\text{OH})](\text{NO}_3)_2$  (**3**) in water.

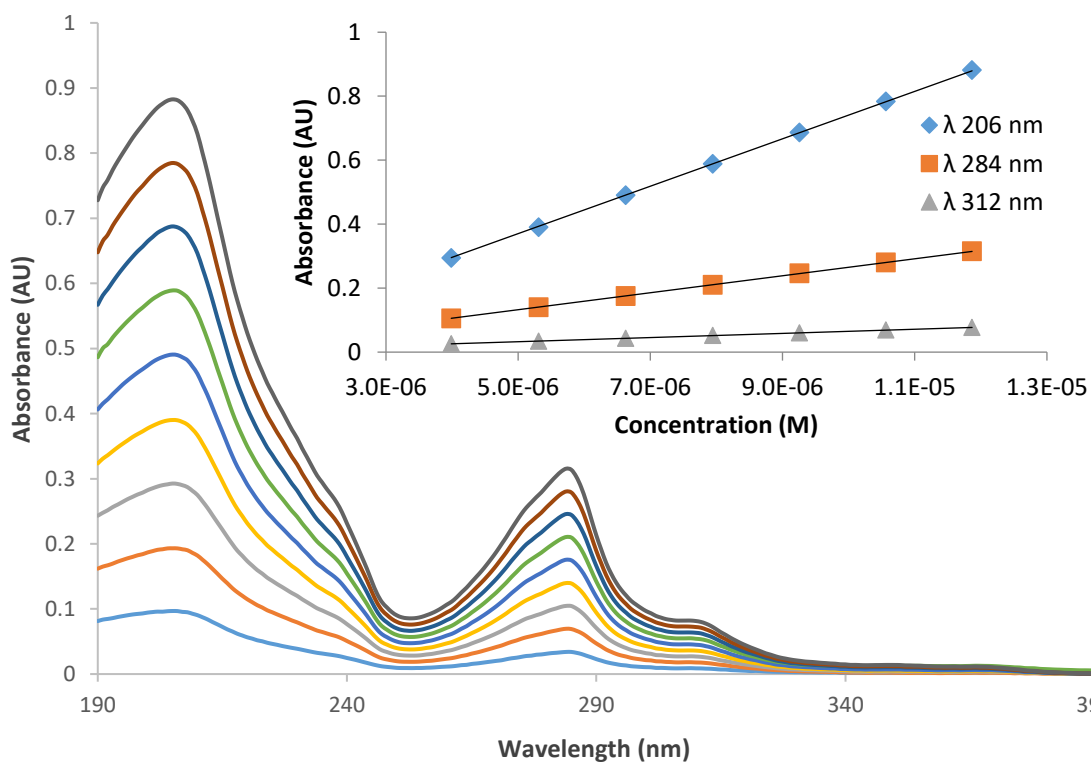

**Figure S30.** The UV spectrum of a replicate of  $[\text{Pt}(5\text{MePhen})(\text{SSDACH})(\text{Biotin})(\text{OH})](\text{NO}_3)_2$  (**4**) in water.

## 9. CD Spectra

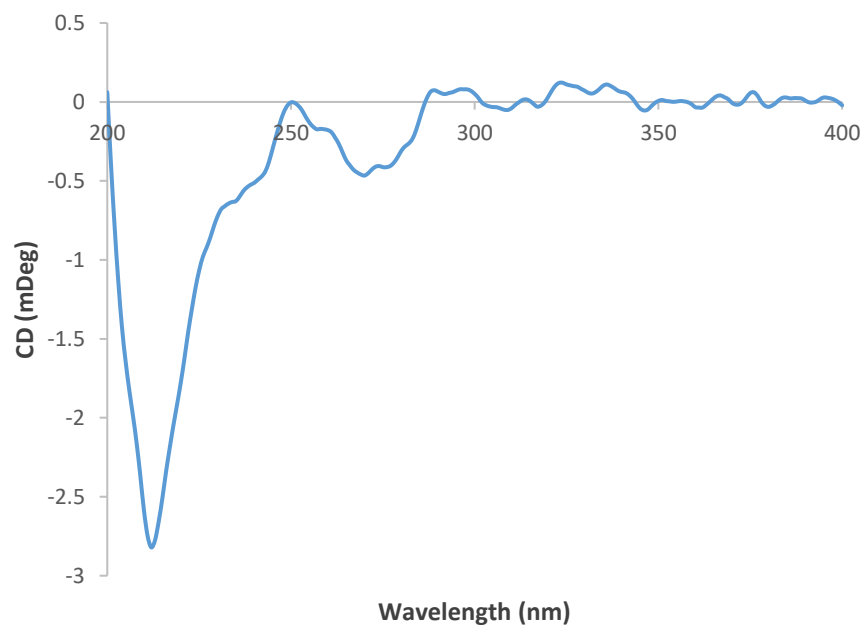

**Figure S31.** The CD spectrum of [Pt(Phen)(SSDACH)(Biotin)(OH)](NO<sub>3</sub>)<sub>2</sub> (**1**) in water. 9pt smoothing applied.

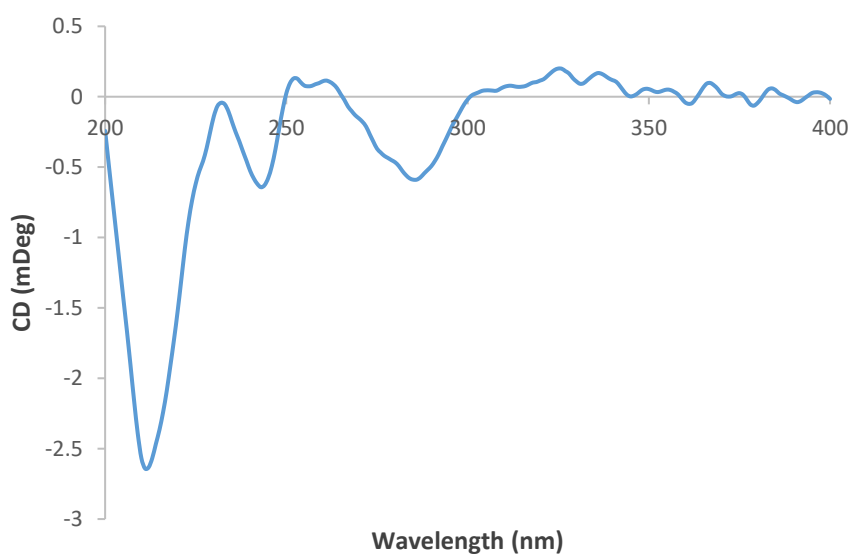

**Figure S32.** The CD spectrum of [Pt(56Me<sub>2</sub>Phen)(SSDACH)(Biotin)(OH)](NO<sub>3</sub>)<sub>2</sub> (**2**) in water. 9pt smoothing applied.

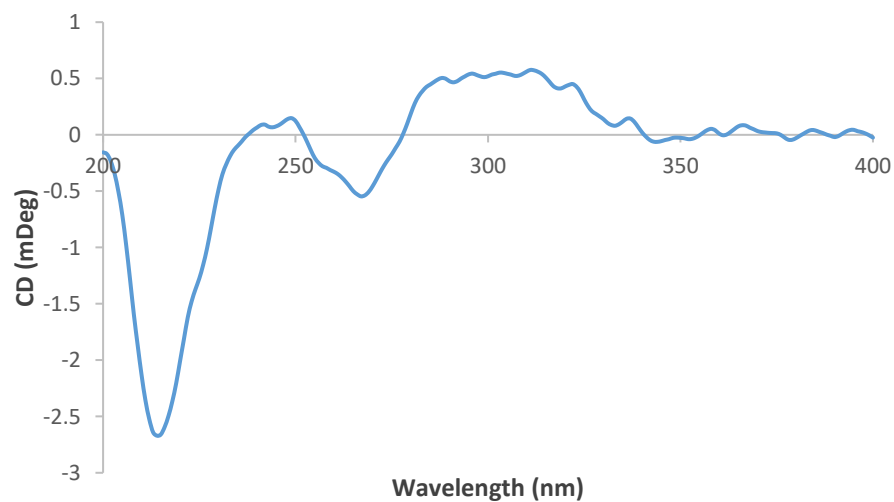

**Figure S33.** The CD spectrum of [Pt(47O<sub>2</sub>Me<sub>2</sub>Phen)(SSDACH)(Biotin)(OH)](NO<sub>3</sub>)<sub>2</sub> (**3**) in water. 9pt smoothing applied.

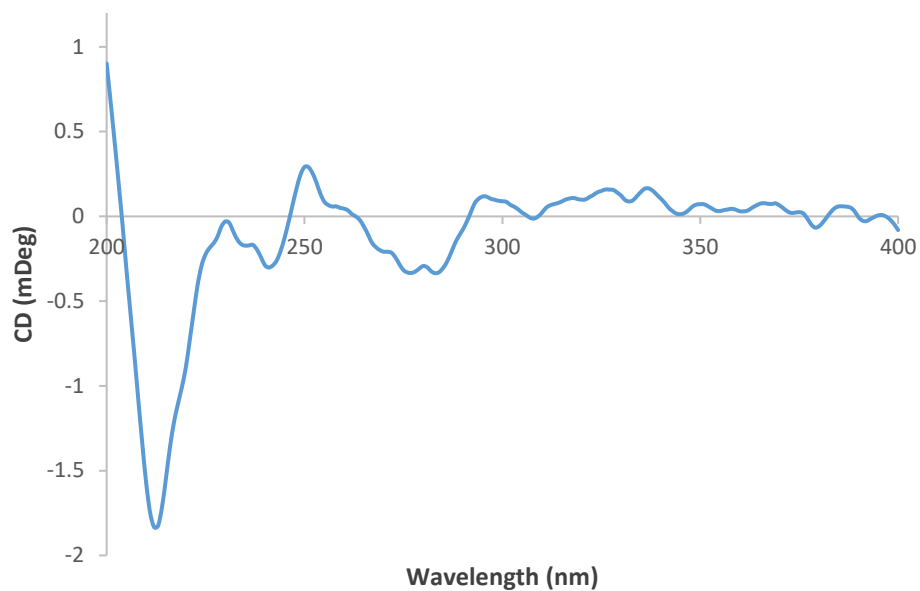

**Figure S34.** The CD spectrum of  $[\text{Pt}(\text{5MePhen})(\text{SSDACH})(\text{Biotin})(\text{OH})](\text{NO}_3)_2$  (**4**) in water. 9pt smoothing applied.

## 11. Reduction Studies

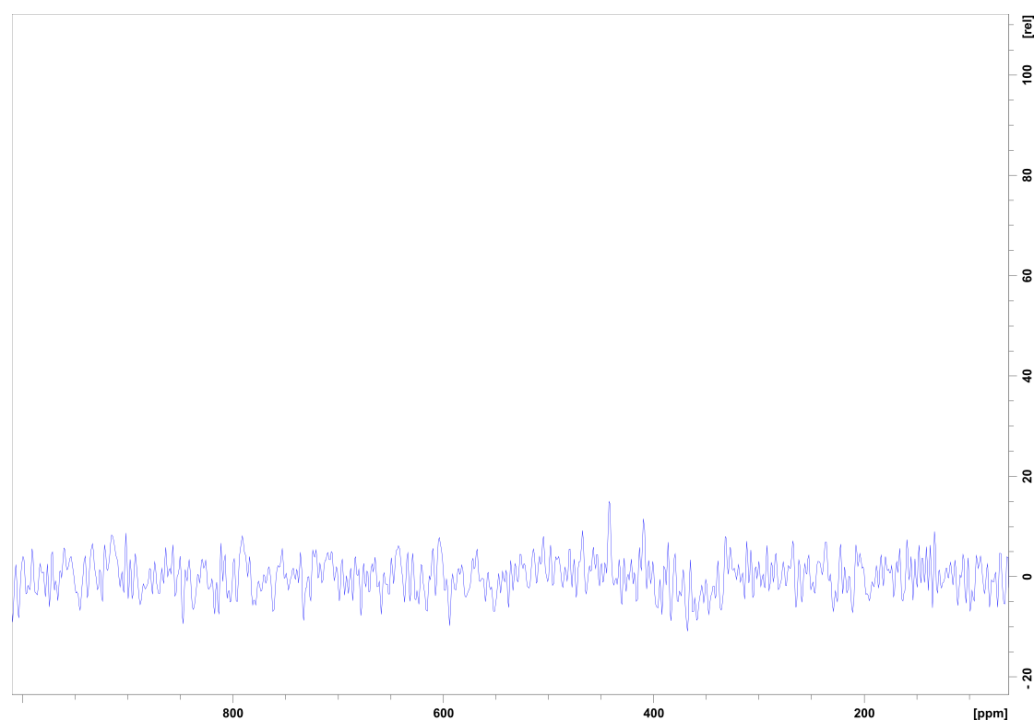

**Figure S35.** The Pt(IV) region in the  $^{195}\text{Pt}$  NMR spectrum of **3** after reduction, showing the disappearance of the peak at 590 ppm.

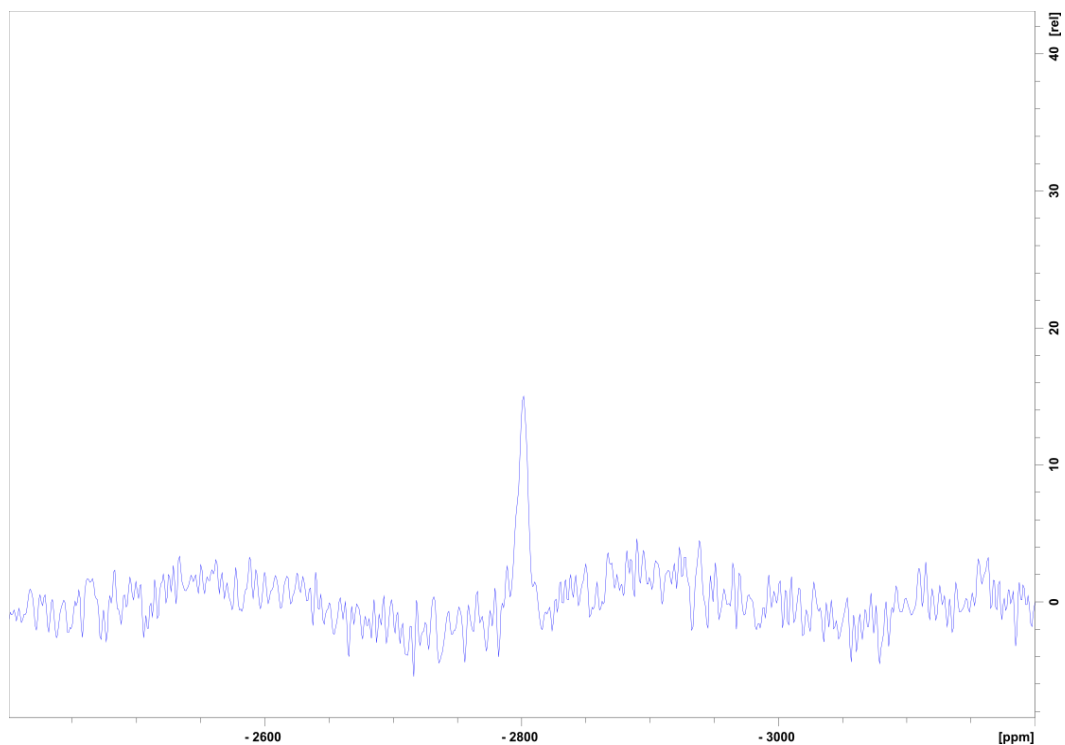

**Figure S36.** The Pt(II) region in the  $^{195}\text{Pt}$  NMR spectrum of **3** after reduction, showing a new peak at -2801 ppm.

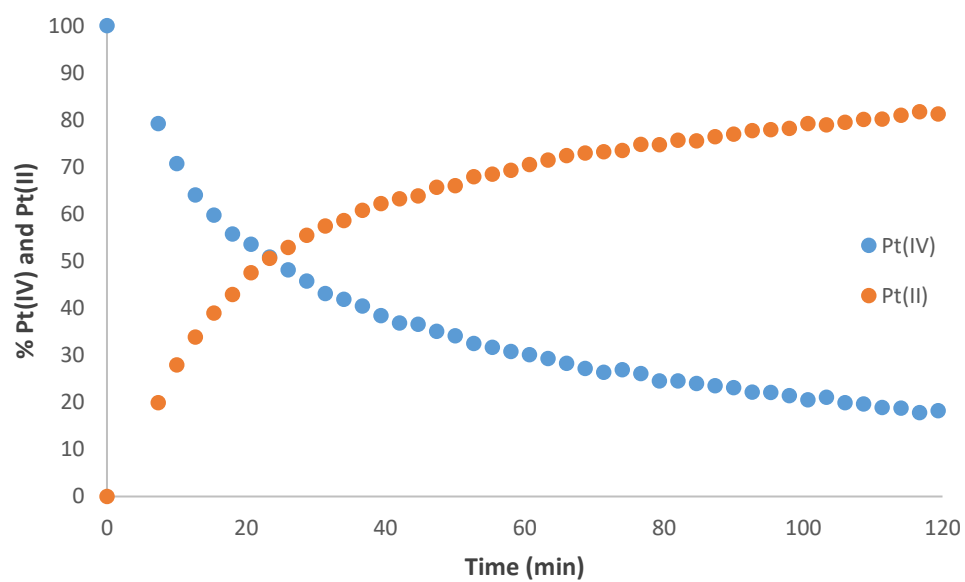

**Figure S37.** A replicate of the time course reduction study of **3** via  $^1\text{H}$  NMR. The Pt(II) and Pt(IV) resonances are plotted as a percentage.

## 12. Lipophilicity Studies

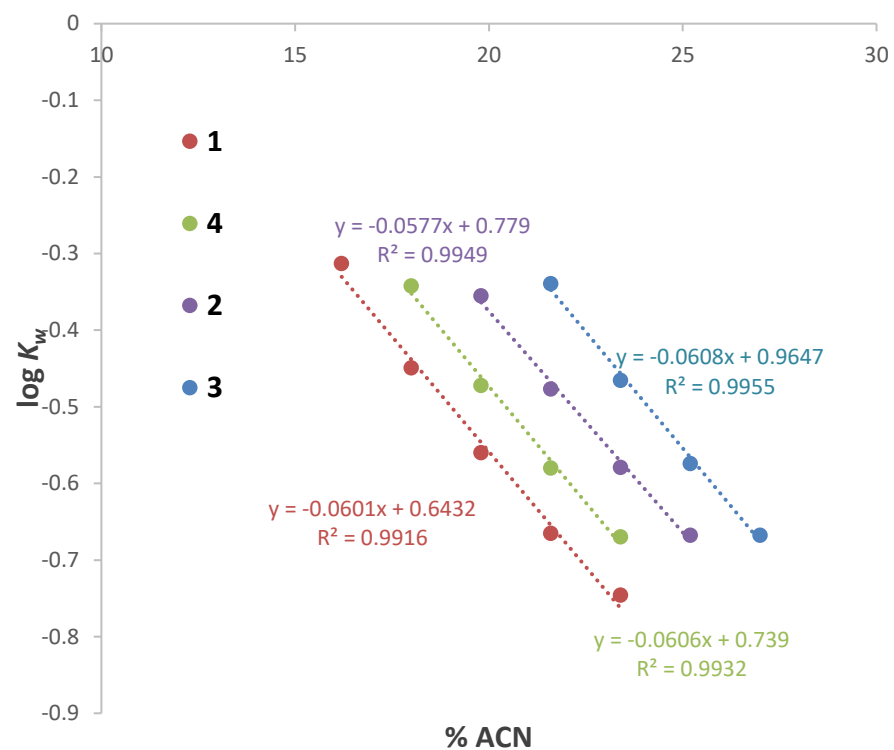

**Figure S38.** Plot of the concentration of organic solvent vs.  $\log k_w$  for 1–4.

#### 14. In vitro Cytotoxicity Studies

**Table S4.** The in vitro cytotoxicity values of complexes **1–4**, their platinum(II) and platinum(IV) precursors, biotin, cisplatin, carboplatin and oxaliplatin. GI<sub>50</sub> values (μM) are reported with standard error of the mean; produced from experiments that were conducted on three separate occasions (n = 3); n.d. = not determined. Resistance factor (RF) defined as GI<sub>50</sub> in ADDP/GI<sub>50</sub> in A2780.

| Complex                  | GI <sub>50</sub> ± SEM (μM) |                |               |                |                |               |                |                |               |                 |                |                |       |
|--------------------------|-----------------------------|----------------|---------------|----------------|----------------|---------------|----------------|----------------|---------------|-----------------|----------------|----------------|-------|
|                          | HT29                        | U87            | MCF-7         | A2780          | H460           | A431          | Du145          | BE2-C          | SJ-G2         | MIA             | MCF10A         | ADDP           | RF    |
| <b>1</b>                 | 0.17 ± 0.06                 | 0.97 ± 0.15    | 0.85 ± 0.14   | 0.25 ± 0.02    | 0.30 ± 0.02    | 0.60 ± 0.11   | 0.12 ± 0.04    | 1 ± 0.1        | 0.29 ± 0.07   | 0.21 ± 0.03     | 0.28 ± 0.04    | 0.24 ± 0.01    | 0.96  |
| <b>2</b>                 | 0.011 ± 0.005               | 0.032 ± 0.008  | 0.022 ± 0.008 | 0.020 ± 0.004  | 0.018 ± 0.004  | 0.036 ± 0.006 | 0.004 ± 0.002  | 0.1 ± 0.01     | 0.036 ± 0.01  | 0.010 ± 0.002   | 0.014 ± 0.004  | 0.011 ± 0.004  | 0.55  |
| <b>3</b>                 | 0.13 ± 0.05                 | 0.32 ± 0.06    | 0.099 ± 0.041 | 0.37 ± 0.03    | 0.27 ± 0.03    | 0.82 ± 0.22   | 0.12 ± 0.04    | 2.0 ± 0.07     | 0.57 ± 0.17   | 0.18 ± 0.01     | 0.30 ± 0.08    | 0.17 ± 0.02    | 0.459 |
| <b>4</b>                 | 0.028 ± 0.009               | 0.11 ± 0.03    | 0.033 ± 0.004 | 0.034 ± 0.005  | 0.032 ± 0.010  | 0.11 ± 0.02   | 0.009 ± 0.004  | 0.1 ± 0.02     | 0.10 ± 0.03   | 0.020 ± 0.004   | 0.031 ± 0.009  | 0.029 ± 0.005  | 0.853 |
| <b>Biotin</b>            | >50                         | >50            | >50           | >50            | >50            | >50           | >50            | >50            | >50           | >50             | >50            | >50            | n.d.  |
| <b>PHENSS(II) [1]</b>    | 0.087 ± 0.027               | 1.2 ± 0.34     | 0.25 ± 0.041  | 0.29 ± 0.037   | 0.30 ± 0.032   | 0.34 ± 0.10   | 0.11 ± 0.027   | 0.39 ± 0.06    | 0.44 ± 0.055  | 0.24 ± 0.022    | 0.24 ± 0.060   | 0.23 ± 0.049   | 0.793 |
| <b>56MESS(II) [1]</b>    | 0.015 ± 0.0062              | 0.076 ± 0.0087 | 0.033 ± 0.012 | 0.039 ± 0.0077 | 0.028 ± 0.0047 | 0.036 ± 0.011 | 0.010 ± 0.0013 | 0.086 ± 0.0030 | 0.15 ± 0.0067 | 0.022 ± 0.00088 | 0.025 ± 0.010  | 0.027 ± 0.0041 | 0.692 |
| <b>47OMESS(II)</b>       | 0.12 ± 0.016                | 0.39 ± 0.06    | 0.15 ± 0.045  | 0.23 ± 0.007   | 0.50 ± 0.058   | 0.35 ± 0.026  | 0.085 ± 0.0048 | 2.6 ± 0.26     | 1.3 ± 0.067   | 0.24 ± 0.042    | 0.43 ± 0.037   | 0.17 ± 0.010   | 0.739 |
| <b>5MESS(II)</b>         | 0.033 ± 0.0038              | 0.32 ± 0.026   | 0.20 ± 0.012  | 0.061 ± 0.010  | 0.041 ± 0.005  | 0.12 ± 0.025  | 0.022 ± 0.0027 | 0.27 ± 0.038   | 0.22 ± 0.01   | 0.048 ± 0.002   | 0.030 ± 0.0018 | 0.034 ± 0.0023 | 0.557 |
| <b>PHENSS(IV) [2]</b>    | 0.71 ± 0.30                 | 4.9 ± 0.61     | 16 ± 4.5      | 0.80 ± 0.084   | 1.7 ± 0.20     | 4.3 ± 0.53    | 0.31 ± 0.092   | 3.0 ± 0.53     | 1.7 ± 0.35    | 3.4 ± 2.2       | 1.7 ± 0.20     | 1.3 ± 0.35     | 1.625 |
| <b>56MESS(IV) [1]</b>    | 0.036 ± 0.0071              | 0.19 ± 0.023   | 0.48 ± 0.14   | 0.056 ± 0.0071 | 0.19 ± 0.15    | 0.12 ± 0.022  | 0.015 ± 0.0026 | 0.24 ± 0.022   | 0.21 ± 0.045  | 0.043 ± 0.0025  | 0.061 ± 0.0073 | 0.17 ± 0.12    | 3.036 |
| <b>47OMESS(IV)</b>       | 0.52 ± 0.085                | 2.6 ± 0.39     | 0.51 ± 0.168  | 1.7 ± 0.23     | 3.1 ± 0.21     | 3.3 ± 0.59    | 0.27 ± 0.038   | 33 ± 3.2       | 7.6 ± 1.8     | 1.9 ± 0.46      | 3.7 ± 0.38     | 1.3 ± 0.058    | 0.765 |
| <b>5MESS(IV)</b>         | 0.15 ± 0.009                | 0.83 ± 0.17    | 0.56 ± 0.200  | 0.11 ± 0.026   | 0.18 ± 0.032   | 0.24 ± 0.007  | 0.036 ± 0.0032 | 1.1 ± 0.18     | 0.60 ± 0.074  | 0.29 ± 0.034    | 0.22 ± 0.026   | 0.18 ± 0.024   | 1.636 |
| <b>Cisplatin [1,3]</b>   | 11.3 ± 1.9                  | 3.8 ± 1.1      | 6.5 ± 0.8     | 1.0 ± 0.1      | 0.9 ± 0.2      | 2.4 ± 0.3     | 1.2 ± 0.1      | 1.9 ± 0.2      | 0.4 ± 0.1     | 7.5 ± 1.3       | 5.2 ± 0.52     | 28 ± 1.7       | 28    |
| <b>Carboplatin [1,3]</b> | >50                         | >50            | >50           | 9.2 ± 2.9      | 14 ± 1.0       | 24.3 ± 2.2    | 14.7 ± 1.2     | 18.7 ± 1.2     | 5.7 ± 0.2     | >50             | >50            | >50            | n.d.  |
| <b>Oxaliplatin [1,3]</b> | 0.9 ± 0.2                   | 1.8 ± 0.2      | 0.5 ± 0.1     | 0.16 ± 0.0     | 1.6 ± 0.1      | 4.1 ± 0.5     | 2.9 ± 0.4      | 0.9 ± 0.2      | 3.0 ± 1.2     | 0.9 ± 0.2       | n.d.           | 0.822 ± 0.13   | 5.138 |

## 15. Platinum Uptake Studies

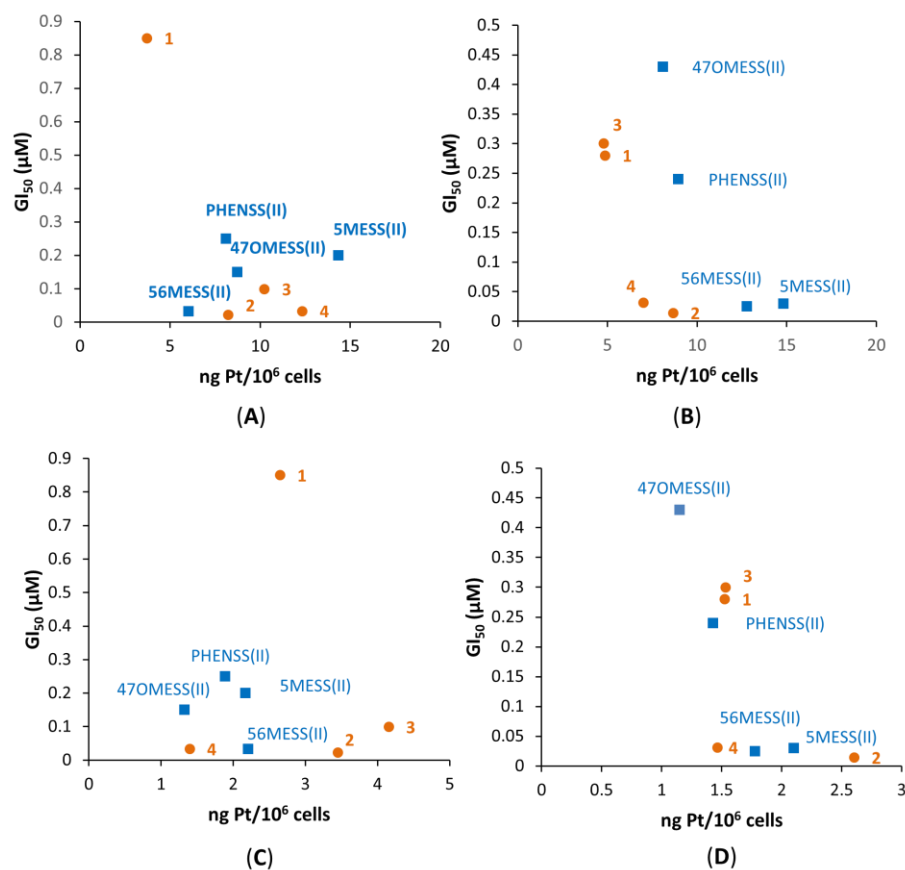

**Figure S39.** The correlation between the cellular accumulation and cytotoxicity of 1–4 and their platinum(II) precursors against MCF-7 (breast cancer, (A) and (C)) and MCF10A (normal breast, (B) and (D)) cells that were treated for 4 hours, at 1.0 μM ((A) and (B)) and 0.1 μM ((C) and (D)) concentrations.

## 16. References

1. Khoury, A.; Sakoff, J.A.; Gilbert, J.; Scott, K.F.; Karan, S.; Gordon, C.P.; Aldrich-Wright, J.R. Cyclooxygenase-inhibiting platinum(IV) prodrugs with potent anticancer activity. *Pharmaceutics*, **2022**, *14*, 787.
2. Deo, K.M.; Sakoff, J.; Gilbert, J.; Zhang, Y.; Wright, J.R.A. Synthesis, characterisation and potent cytotoxicity of unconventional platinum (IV) complexes with modified lipophilicity. *Dalton Transactions*, **2019**, *48*, 17217–17227.
3. Macias, F.J.; Deo, K.M.; Wormell, P.; Clegg, J.K.; Zhang, Y.; Li, F.; Zheng, G.; Sakoff, J.; Gilbert, J.; Aldrich-Wright, J.R. Synthesis and analysis of the structure, diffusion and cytotoxicity of heterocyclic platinum(IV) complexes. *Chemistry a European Journal*, **2015**, *21*, 16990–17001.
